# Supplementary material for: Evaluation of the health and healthcare system burden due to antimicrobial-resistant Escherichia coli infections in humans: a systematic review and meta-analysis
Source: PubMed Central journal article supplement (PMC7726913; doi:10.1186/s13756-020-00863-x), 2020-12-10
Supplement: 13756_2020_863_MOESM3_ESM.pdf [file 13756_2020_863_MOESM3_ESM.pdf]

**Additional file 3 – Screening questions for a systematic review evaluating whether the measures of health or healthcare system burden increase in humans with antimicrobial-resistant *E. coli* infections.**

Primary Screening

Primary screening was performed on titles and abstracts with possible answers of ‘yes,’ ‘no’ or ‘unclear.’

- 1) Does the title and/or abstract indicate the study subjects are human?
- 2) Does the title and/or abstract describe an analytic observational study?
- 3) Does the title and/or abstract indicate the study participants have *E. coli* infections?
- 4) Does the title and/or abstract indicate at least some of the study participants have an *E. coli* infection that is resistant to third/fourth/fifth generation cephalosporins, or quinolones, or is multidrug resistant?
- 5) Is the study published in English?

Secondary Screening

Secondary screening was performed on full text articles with possible answers of ‘yes’ or ‘no.’

- 1) Are the study subjects human?
- 2) Is the study an analytic observational study?
- 3) Do the study participants have a confirmed infection with *E. coli*?
- 4) Do at least some of the study participants have an *E. coli* infection that is resistant to third/fourth/fifth generation cephalosporins, or quinolones, or is multidrug resistant?
- 5) Is there a comparator group that is susceptible to third/fourth/fifth generation cephalosporins, or quinolones, or is not multidrug resistant?
- 6) Does the study assess at least one outcome of interest?
- 7) Does the study have outcome data specific to *E. coli* infections?
