# Supplementary material for: Evaluation of the health and healthcare system burden due to antimicrobial-resistant Escherichia coli infections in humans: a systematic review and meta-analysis
Source: PubMed Central journal article supplement (PMC7726913; doi:10.1186/s13756-020-00863-x), 2020-12-10
Supplement: 13756_2020_863_MOESM5_ESM.pdf [file 13756_2020_863_MOESM5_ESM.pdf]

**Additional file 5 - Characteristics of the studies and participants included in systematic review evaluating whether the measures of health or healthcare system burden increase in humans with antimicrobial-resistant *E. coli* infections**

| Study Characteristics                               |                                                                |                                  |                                                                    |                                 |              |                                   |                             |                    |                                                                                                                                                                                 | Demographics (Age and Sex)           |                     |                           |                  | BoD / Overall                                                                                       |
|-----------------------------------------------------|----------------------------------------------------------------|----------------------------------|--------------------------------------------------------------------|---------------------------------|--------------|-----------------------------------|-----------------------------|--------------------|---------------------------------------------------------------------------------------------------------------------------------------------------------------------------------|--------------------------------------|---------------------|---------------------------|------------------|-----------------------------------------------------------------------------------------------------|
| Citation<br>(Reference # in<br>manuscript)          | Type of Resistance                                             | Author reported<br>study design  | Study design in<br>the context of<br>systematic<br>review outcomes | Prospective or<br>retrospective | Country      | World<br>Bank<br>income<br>status | Data<br>Collection<br>Years | Number of<br>Sites | Details of Site(s)                                                                                                                                                              | General age(s)<br>included in        | Overall %<br>female | % female<br>in R<br>group | % female<br>in S | BoD Outcome                                                                                         |
| Abernethy, J. K.,<br><i>et al.</i> 2015. (50)       | Third/fourth/fifth<br>generation<br>cephalosporins or<br>ESBLs | Surveillance                     | Cohort                                                             | Retrospective                   | England      | High                              | 07/2011 -<br>06/2012        | ≥3                 | National mandatory<br>surveillance in England                                                                                                                                   | No age<br>restriction in<br>sampling | 53.2                | nr                        | nr               | 1) 30-day mortality;<br>2) All-cause mortality                                                      |
| Abernethy, J. K.,<br><i>et al.</i> 2015. (50)       | Quinolones                                                     | Surveillance                     | Cohort                                                             | Retrospective                   | England      | High                              | 07/2011 -<br>06/2012        | ≥3                 | National mandatory<br>surveillance in England                                                                                                                                   | No age<br>restriction in<br>sampling | 53.2                | nr                        | nr               | 1) 30-day mortality;<br>2) All-cause mortality                                                      |
| Al-Otaibi, F. E.,<br><i>et al.</i> 2013. (87)       | Third/fourth/fifth<br>generation<br>cephalosporins or<br>ESBLs | Clinical and<br>laboratory study | Cohort                                                             | Retrospective                   | Saudi Arabia | High                              | 06/2009 -<br>06/2011        | 1                  | Tertiary care hospital,<br>King Khalid University<br>Hospital, Riyadh, KSA                                                                                                      | No age<br>restriction in<br>sampling | 71.7                | 56                        | nr               | 1) All-cause mortality                                                                              |
| Alvarez-Uria,<br>G., <i>et al.</i> 2012.<br>(37)    | Third/fourth/fifth<br>generation<br>cephalosporins or<br>ESBLs | Observational                    | Cohort                                                             | Unable to<br>determine          | India        | Lower-<br>middle                  | 03/2011 -<br>03/2012        | 1                  | Bathalapalli Rural<br>Development Trust<br>Hospital, non-profit<br>private district hospital<br>in Andhra Pradesh,<br>India (resource limited<br>district hospital in<br>India) | No age<br>restriction in<br>sampling | 37.1                | nr                        | nr               | 1) All-cause mortality                                                                              |
| Anunnatsiri, S.,<br><i>et al.</i> 2012. (42)        | Third/fourth/fifth<br>generation<br>cephalosporins or<br>ESBLs | Not reported                     | Cohort                                                             | Retrospective                   | Thailand     | Upper-<br>middle                  | 01/2005 -<br>12/2006        | 1                  | Tertiary care hospital,<br>Srinagarind Hospital,<br>Thailand                                                                                                                    | ≥15                                  | nr                  | 46.9                      | 57.5             | 1) All-cause<br>mortality, 2)<br>Treatment failure, 3)<br>Post-infection length<br>of hospital stay |
| Apisarnthanarak,<br>A., <i>et al.</i> 2008.<br>(43) | Third/fourth/fifth<br>generation<br>cephalosporins or<br>ESBLs | Case-control                     | Cohort                                                             | Retrospective                   | Thailand     | Upper-<br>middle                  | 07/2003 -<br>06/2004        | 1                  | Tertiary care hospital,<br>Thammasart University<br>Hospital, in<br>Praturmthani, Thailand                                                                                      | ≥ 16                                 | nr                  | 71                        | 74               | 1) All-cause<br>mortality, 2) Length<br>of hospital stay, 3)<br>Healthcare system<br>costs          |
| Artero, A., <i>et al.</i><br>2017. (95)             | Third/fourth/fifth<br>generation<br>cephalosporins or<br>ESBLs | Cohort                           | Cohort                                                             | Prospective                     | Spain        | High                              | 01/2013 -<br>12/2015        | 1                  | Tertiary-care hospital,<br>University Hospital Dr.<br>Peset, Valencia, Spain                                                                                                    | ≥65                                  | 64                  | 62.4                      | 64.5             | 1) All-cause<br>mortality, 2) Length<br>of hospital stay                                            |

|                                           |                                                       |              |        |               |        |              |                   |    |                                                                                                                   |                                |      |      |      |                                                                                               |
|-------------------------------------------|-------------------------------------------------------|--------------|--------|---------------|--------|--------------|-------------------|----|-------------------------------------------------------------------------------------------------------------------|--------------------------------|------|------|------|-----------------------------------------------------------------------------------------------|
| Bert, F., <i>et al.</i> 2008. (103)       | Quinolones                                            | Not reported | Cohort | Retrospective | France | High         | 01/1997 - 12/2005 | 1  | Hospital AP-HP Beaujon, Clichy, France                                                                            | No age restriction in sampling | 21.1 | nr   | nr   | 1) All-cause mortality                                                                        |
| Bollestad, M., <i>et al.</i> 2018. (107)  | Third/fourth/fifth generation cephalosporins or ESBLs | Cohort       | Cohort | Prospective   | Norway | High         | 04/2013 - 08/2016 | ≥3 | 8 microbiology laboratories (patients included from 76 different geographically diverse municipalities in Norway) | ≥16                            | 100  | 100  | 100  | 1) Treatment failure                                                                          |
| Camins, B. C., <i>et al.</i> 2011. (78)   | Quinolones                                            | Case-control | Cohort | Retrospective | USA    | High         | 01/2000 - 12/2005 | 1  | Barnes-Jewish Hospital, St. Louis, Missouri                                                                       | No age restriction in sampling | nr   | 66   | 53   | 1) 30-day mortality, 2) All-cause mortality, 3) Treatment failure, 4) Length of hospital stay |
| Can, F., <i>et al.</i> 2015. (41)         | Third/fourth/fifth generation cephalosporins or ESBLs | Cohort       | Cohort | Prospective   | Turkey | Upper-middle | 01/2011 - 12/2011 | 1  | Outpatient clinic, Baskent University Hospital, Ankara, Turkey                                                    | No age restriction in sampling | nr   | nr   | nr   | 1) Treatment failure                                                                          |
| Can, F., <i>et al.</i> 2015. (41)         | Quinolones                                            | Cohort       | Cohort | Prospective   | Turkey | Upper-middle | 01/2011 - 12/2011 | 1  | Outpatient clinic, Baskent University Hospital, Ankara, Turkey                                                    | No age restriction in sampling | nr   | nr   | nr   | 1) Treatment failure                                                                          |
| Can, F., <i>et al.</i> 2015. (41)         | Multidrug resistance                                  | Cohort       | Cohort | Prospective   | Turkey | Upper-middle | 01/2011 - 12/2011 | 1  | Outpatient clinic, Baskent University Hospital, Ankara, Turkey                                                    | No age restriction in sampling | nr   | nr   | nr   | 1) Treatment failure                                                                          |
| Cereto, F., <i>et al.</i> 2008. (104)     | Quinolones                                            | Not reported | Cohort | Prospective   | Spain  | High         | 01/2004 - 12/2005 | ≥3 | Three tertiary hospitals from the Barcelona area                                                                  | No age restriction in sampling | nr   | 34   | 28   | 1) All-cause mortality, 2) Treatment failure                                                  |
| Cereto, F., <i>et al.</i> 2008. (104)     | Quinolones                                            | Not reported | Cohort | Retrospective | Spain  | High         | 01/1996 - 06/2002 | 1  | Hospital Universitari Vall d'Hebron, Barcelona, Spain                                                             | No age restriction in sampling | nr   | 50   | 29   | 1) All-cause mortality                                                                        |
| Chakraborty, A., <i>et al.</i> 2012. (38) | Third/fourth/fifth generation cephalosporins or ESBLs | Not reported | Cohort | Retrospective | India  | Lower-middle | 05/2010 - 07/2011 | 1  | Tertiary care hospital at Mangalore                                                                               | No age restriction in sampling | nr   | 37.9 | 51.5 | 1) All-cause mortality, 2) Treatment failure                                                  |

|                                                |                                                       |              |        |                     |                       |                    |                   |    |                                                                                                                                                                                   |                                |    |    |      |                                                                               |
|------------------------------------------------|-------------------------------------------------------|--------------|--------|---------------------|-----------------------|--------------------|-------------------|----|-----------------------------------------------------------------------------------------------------------------------------------------------------------------------------------|--------------------------------|----|----|------|-------------------------------------------------------------------------------|
| Chauhan, S., 2015. (40)                        | Third/fourth/fifth generation cephalosporins or ESBLs | Case-control | Cohort | Unable to determine | India                 | Lower-middle       | 01/2012-08/2012   | 1  | One hospital in Northern India, Shri Mahant Indresh Hospital and Shri Guru Ram Rai Institute of Health and medical Sciences, Dehradun city - teaching hospital in north India.    | No age restriction in sampling |    | 60 | 59   | 1) Treatment failure, 2) Length of stay                                       |
| Cheong, H. J., <i>et al.</i> 2001. (101)       | Quinolones                                            | Case-control | Cohort | Retrospective       | Republic of Korea     | High               | 09/1993 - 08/1998 | 1  | Korea University Guro Hospital                                                                                                                                                    | No age restriction in sampling | nr | 30 | 58.8 | 1) All-cause mortality                                                        |
| Cheong, H. S., <i>et al.</i> 2007. (60)        | Third/fourth/fifth generation cephalosporins or ESBLs | Cohort       | Cohort | Retrospective       | Republic of Korea     | High               | 02/2002 - 12/2005 | 1  | Samsung Medical Centre, Seoul, Korea                                                                                                                                              | ≥ 15                           | nr | nr | nr   | 1) 30-day mortality, 2) All-cause mortality                                   |
| Cheong, H. S., <i>et al.</i> 2007. (60)        | Quinolones                                            | Cohort       | Cohort | Retrospective       | Republic of Korea     | High               | 02/2002 - 12/2005 | 1  | Samsung Medical Centre, Seoul, Korea                                                                                                                                              | ≥ 15                           | nr | nr | nr   | 1) 30-day mortality, 2) All-cause mortality                                   |
| Cheong, H. S., <i>et al.</i> 2007. (60)        | Multidrug resistance                                  | Cohort       | Cohort | Retrospective       | Republic of Korea     | High               | 02/2002 - 12/2005 | 1  | Samsung Medical Centre, Seoul, Korea                                                                                                                                              | ≥ 15                           | nr | nr | nr   | 1) 30-day mortality, 2) All-cause mortality                                   |
| Cornejo-Juarez, P., <i>et al.</i> 2012. (44)   | Third/fourth/fifth generation cephalosporins or ESBLs | Case-control | Cohort | Retrospective       | Mexico                | Upper-middle       | 01/2004 - 12/2009 | 1  | Instituto Nacional de Cancerologia, tertiary oncology teaching hospital in Mexico                                                                                                 | No age restriction in sampling | 49 | 55 | 42   | 1) All-cause mortality, 2) Bacterium-attributable mortality                   |
| Courpon-Claudinon, A. <i>et al.</i> 2011. (85) | Third/fourth/fifth generation cephalosporins or ESBLs | Not reported | Cohort | Prospective         | France                | High               | 01/2005 - 12/2005 | ≥3 | 15 hospitals across France, all except one were university hospitals                                                                                                              | ≥ 18                           | nr | 41 | 58.1 | 1) All-cause mortality                                                        |
| de Kraker, M. E., <i>et al.</i> 2011. (49)     | Third/fourth/fifth generation cephalosporins or ESBLs | Cohort       | Cohort | Prospective         | 13 European Countries | High; Upper-middle | 07/2007 - 06/2008 | ≥3 | 13 tertiary care centres in 13 European countries: Austria, Belgium, Croatia, England, Germany, Greece, Ireland, Italy, Latvia, Malta, Romania (upper-middle), Scotland, Slovenia | ≥ 18                           | nr | 52 | 56   | 1) 30-day mortality, 2) All-cause mortality, 3) Post-infection length of stay |
| Denis, B., <i>et al.</i> 2015. (74)            | Third/fourth/fifth generation cephalosporins or ESBLs | Case-control | Cohort | Retrospective       | France                | High               | 01/2005 - 12/2008 | 1  | Saint Louis Hospital, tertiary hospital                                                                                                                                           | No age restriction in sampling | nr | 34 | 32   | 1) 30-day mortality, 2) All-cause mortality, 3) Length of stay                |

|                                            |                                                       |               |        |               |                   |              |                   |     |                                                                                                                                                            |                                |      |      |      |                                                                                                                  |
|--------------------------------------------|-------------------------------------------------------|---------------|--------|---------------|-------------------|--------------|-------------------|-----|------------------------------------------------------------------------------------------------------------------------------------------------------------|--------------------------------|------|------|------|------------------------------------------------------------------------------------------------------------------|
| Eom, J. S., <i>et al.</i> 2002. (77)       | Quinolones                                            | Case-control  | Cohort | Retrospective | Republic of Korea | High         | 01/2000 - 12/2000 | 1   | Korea University Guro Hospital                                                                                                                             | No age restriction in sampling | nr   | 73.3 | 70   | 1) 30-day mortality, 2) All-cause mortality, 3) Treatment failure                                                |
| Esteve-Palau, E., <i>et al.</i> 2015. (75) | Third/fourth/fifth generation cephalosporins or ESBLs | Cohort        | Cohort | Retrospective | Spain             | High         | 08/2010 - 07/2013 | 1   | Hospital del Mar, Barcelona, Spain                                                                                                                         | ≥ 18                           | 43   | 43   | 43   | 1) 30-day mortality, 2) All-cause mortality, 3) Treatment failure, 4) Length of stay, 5) Healthcare system costs |
| Fan, N. C., <i>et al.</i> 2014. (108)      | Third/fourth/fifth generation cephalosporins or ESBLs | Case-control  | Cohort | Retrospective | Taiwan            | High         | 01/2002 - 12/2006 | 1   | Chang Gung Children's Hospital                                                                                                                             | < 15 yr old                    | nr   | nr   | nr   | 1) Treatment failure, 2) Length of stay                                                                          |
| Feng, X. R., <i>et al.</i> 2014. (47)      | Third/fourth/fifth generation cephalosporins or ESBLs | Not reported  | Cohort | Prospective   | China             | Upper-middle | 01/2006 - 12/2011 | 1   | First Affiliated Hospital of Sun Yat-sen University, Guangzhou, China                                                                                      | No age restriction in sampling | 39.7 | nr   | nr   | 1) Bacterium-attributable mortality, 2) Treatment failure                                                        |
| Freeman, J. T., <i>et al.</i> 2012. (70)   | Third/fourth/fifth generation cephalosporins or ESBLs | Case-control  | Cohort | Retrospective | New Zealand       | High         | 05/2003 - 03/2007 | 1   | Middlemore Hospital (University-affiliated tertiary hospital) Auckland                                                                                     | No age restriction in sampling | nr   | nr   | nr   | 1) 30-day mortality, 2) All-cause mortality                                                                      |
| Gagliotti, C., <i>et al.</i> 2008. (111)   | Quinolones                                            | Cohort        | Cohort | Prospective   | Italy             | High         | 01/2006 - 12/2006 | ≥ 3 | Database of Antimicrobial Resistance Surveillance System of Emilia-Romagna (includes laboratories belonging to 13 of 17 Local health trusts of the region) | ≥ 18                           | 100  | 100  | 100  | 1) Treatment failure                                                                                             |
| Garau, J., <i>et al.</i> 1999. (100)       | Quinolones                                            | Not reported  | Cohort | Retrospective | Spain             | High         | 01/1992 - 12/1997 | 1   | The Hospital Mutua de Terrassa, Terrassa, Spain                                                                                                            | No age restriction in sampling | nr   | 37.1 | 47.4 | 1) All-cause mortality                                                                                           |
| Gudiol, C., <i>et al.</i> 2010. (67)       | Third/fourth/fifth generation cephalosporins or ESBLs | Observational | Cohort | Prospective   | Spain             | High         | 01/2006 - 10/2008 | 1   | University cancer centre for adults                                                                                                                        | ≥ 18                           | 41   | 71   | 37   | 1) 30-day mortality, 2) All-cause mortality                                                                      |
| Ha, Y. E., <i>et al.</i> 2013. (72)        | Third/fourth/fifth generation cephalosporins or ESBLs | Cohort        | Cohort | Retrospective | Republic of Korea | High         | 01/2010 - 05/2012 | 1   | Samsung Medical Center, Seoul, Korea                                                                                                                       | ≥ 16                           | 45.1 | 42.1 | 46.3 | 1) 30-day mortality, 2) All-cause mortality                                                                      |

|                                                |                                                       |               |        |               |                   |      |                                         |     |                                                                                                            |                                |      |      |      |                                                                                        |
|------------------------------------------------|-------------------------------------------------------|---------------|--------|---------------|-------------------|------|-----------------------------------------|-----|------------------------------------------------------------------------------------------------------------|--------------------------------|------|------|------|----------------------------------------------------------------------------------------|
| Haruki, Y., <i>et al.</i> 2018. (76)           | Third/fourth/fifth generation cephalosporins or ESBLs | Cohort        | Cohort | Retrospective | Japan             | High | 01/2006 - 12/2006                       | 1   | Tsuyama Chou Hospital, Okayama, Japan                                                                      | No age restriction in sampling | nr   | 54   | 54.5 | 1) 30-day mortality, 2) All-cause mortality                                            |
| Henshke-Bar-Meir, R., <i>et al.</i> 2006. (80) | Third/fourth/fifth generation cephalosporins or ESBLs | Cohort        | Cohort | Retrospective | Israel            | High | 2000 - 2001                             | 1   | University-affiliated general hospital, Jerusalem                                                          | No age restriction in sampling | nr   | nr   | nr   | 1) All-cause mortality                                                                 |
| Ho, P. L., <i>et al.</i> 2002. (64)            | Third/fourth/fifth generation cephalosporins or ESBLs | Case-control  | Cohort | Retrospective | Hong Kong         | High | 01/1996 - 12/1998                       | 1   | Tertiary care hospital, Queen Mary Hospital, Hong Kong                                                     | No age restriction in sampling | 60   | 60   | 60   | 1) 30-day mortality, 2) All-cause mortality                                            |
| Hsieh, C. J., <i>S et al.</i> 2010. (68)       | Third/fourth/fifth generation cephalosporins or ESBLs | Not reported  | Cohort | Retrospective | Taiwan            | High | 01/2005 - 12/2006                       | 1   | Chang Gung Memorial Hospital, Kaohsiung, Taiwan                                                            | No age restriction in sampling | 58.4 | 78.9 | 57.4 | 1) 30-day mortality, 2) All-cause mortality, 3) Post-infection length of hospital stay |
| Huang, Y. Y., <i>et al.</i> 2018. (97)         | Third/fourth/fifth generation cephalosporins or ESBLs | Case-control  | Cohort | Retrospective | Canada            | High | 01/2011 - 06/2013                       | 1   | Surrey Memorial Hospital, Surrey, BC                                                                       | ≥ 19                           | 59.1 | 43.1 | 66.9 | 1) All-cause mortality, 2) Length of hospital stay                                     |
| Huotari, K., <i>et al.</i> 2003. (54)          | Quinolones                                            | Case-control  | Cohort | Retrospective | Finland           | High | 01/1997 - 12/1999                       | 1   | Helsinki University Central Hospital, Helsinki, Finland                                                    | ≥ 18                           | nr   | 58.8 | 69.6 | 1) 30-day mortality, 2) All-cause mortality, 3) Length of hospital stay                |
| Jeon, J. H., <i>et al.</i> 2012. (110)         | Quinolones                                            | Observational | Cohort | Prospective   | Republic of Korea | High | 03/2005 - 12/2008                       | 1   | Seoul National University Bundang Hospital, Seoul, Korea                                                   | ≥ 15                           | 100  | 100  | 100  | 1) Treatment failure, 2) Length of stay                                                |
| Kang, C. I., <i>et al.</i> 2010. (51)          | Third/fourth/fifth generation cephalosporins or ESBLs | Cohort        | Cohort | Retrospective | Republic of Korea | High | 10/2006 - 09/2007 and 09/2008 - 04/2009 | ≥ 3 | 18 hospitals in South Korea (nationwide surveillance)                                                      | No age restriction in sampling | nr   | 51.2 | 63.6 | 1) 30-day mortality, 2) All-cause mortality, 3) Treatment failure                      |
| Kang, C. I., <i>et al.</i> 2011. (52)          | Third/fourth/fifth generation cephalosporins or ESBLs | Surveillance  | Cohort | Retrospective | Republic of Korea | High | 10/2006 - 09/2007 and 10/2008 - 04/2009 | ≥ 3 | 18 hospitals in South Korea (nationwide surveillance)                                                      | ≥ 16                           | nr   | nr   | nr   | 1) 30-day mortality, 2) All-cause mortality                                            |
| Kang, C. I., <i>et al.</i> 2012. (71)          | Third/fourth/fifth generation cephalosporins or ESBLs | Case-control  | Cohort | Retrospective | Republic of Korea | High | 09/2010- 06/2011                        | 2   | Samsung Medical Center (Tertiary), Seoul, Korea and Samsung Changwon Hospital (community), Changwon, Korea | >15 years                      | nr   | 64.8 | 79.6 | 1) 30-day mortality, 2) All-cause mortality                                            |

|                                            |                                                       |                             |        |               |                       |              |                   |     |                                                                                                                  |                                |      |      |      |                                                                 |
|--------------------------------------------|-------------------------------------------------------|-----------------------------|--------|---------------|-----------------------|--------------|-------------------|-----|------------------------------------------------------------------------------------------------------------------|--------------------------------|------|------|------|-----------------------------------------------------------------|
| Kaya, O., <i>et al.</i> 2013. (46)         | Third/fourth/fifth generation cephalosporins or ESBLs | Not reported                | Cohort | Retrospective | Turkey                | Upper-middle | 01/2007 - 10/2011 | 1   | Sleyman Demirel University Research Hospital, Isparta, Turkey                                                    | ≥ 18                           | 48.7 | 45.5 | 50.7 | 1) All-cause mortality                                          |
| Khan, F. Y., <i>et al.</i> 2010. (82)      | Third/fourth/fifth generation cephalosporins or ESBLs | observational, surveillance | Cohort | Prospective   | Qatar                 | High         | 07/2007 - 06/2008 | ≥ 3 | 3 Hospitals that comprise the Hamad Medical Corporation in Qatar                                                 | No age restriction in sampling | nr   | nr   | nr   | 1) All-cause mortality                                          |
| Kim, J., <i>et al.</i> 2014. (79)          | Quinolones                                            | Case-control                | Cohort | Retrospective | Republic of Korea     | High         | 06/2000 - 08/2011 | 1   | Samsung Medical Center, Seoul, Korea                                                                             | ≥ 18                           | nr   | 26.1 | 28.6 | 1) 30-day mortality, 2) All-cause mortality                     |
| Kim, S. H., <i>et al.</i> 2013. (73)       | Third/fourth/fifth generation cephalosporins or ESBLs | Not reported                | Cohort | Retrospective | Republic of Korea     | High         | 01/2007 - 12/2008 | 1   | Hematology ward of a tertiary hospital in Seoul, South Korea                                                     | No age restriction in sampling | nr   | nr   | nr   | 1) 30-day mortality, 2) All-cause mortality                     |
| Komatsu, Y., <i>et al.</i> 2018. (98)      | Third/fourth/fifth generation cephalosporins or ESBLs | Case-control                | Cohort | Retrospective | Japan                 | High         | 01/2008 - 05/2013 | 1   | Nara Medical University, Tertiary Care Hospital, Nara, Japan                                                     | ≥ 18                           | nr   | 36.7 | 56.5 | 1) All-cause mortality                                          |
| Lambert, M. L., <i>et al.</i> 2011. (53)   | Third/fourth/fifth generation cephalosporins or ESBLs | Cohort                      | Cohort | Prospective   | 10 European Countries | High         | 01/2005 - 12/2008 | ≥ 3 | 10 European countries - Austria, Belgium, Croatia, France, Italy, Latvia, Portugal, Slovakia, Scotland and Spain | No age restriction in sampling | nr   | nr   | nr   | 1) All-cause mortality, 2) Post-infection length of stay        |
| Laupland, K. B., <i>et al.</i> 2008. (105) | Quinolones                                            | Cohort                      | Cohort | Prospective   | Canada                | High         | 01/2000 - 12/2006 | ≥ 3 | Calgary Health Region, population-based study                                                                    | No age restriction in sampling | nr   | nr   | nr   | 1) All-cause mortality                                          |
| Lee, H., <i>et al.</i> 2018. (99)          | Third/fourth/fifth generation cephalosporins or ESBLs | Case-control                | Cohort | Retrospective | Republic of Korea     | High         | 06/2015 - 12/2006 | 1   | Tertiary hospital                                                                                                | ≥ 18                           | nr   | 75   | nr   | 1) All-cause mortality, 2) Length of stay                       |
| Lee, S., <i>et al.</i> 2014. (89)          | Third/fourth/fifth generation cephalosporins or ESBLs | Cohort                      | Cohort | Retrospective | Republic of Korea     | High         | 01/2009 - 12/2011 | 1   | secondary care hospital, Daegu, South Korea                                                                      | No age restriction in sampling | nr   | 85   | 90   | 1) All-cause mortality, 2) Treatment failure, 3) Length of stay |
| Leistner, R., <i>et al.</i> 2014. (112)    | Third/fourth/fifth generation cephalosporins or ESBLs | Case-control                | Cohort | Retrospective | Germany               | High         | 01/2008 - 12/2010 | 1   | Charite University Hospital, Berlin, Germany                                                                     | No age restriction in sampling | nr   | 38   | 38   | 1) Post-infection length of stay, 2) Healthcare system costs    |
| Leistner, R., <i>et al.</i> 2014. (90)     | Third/fourth/fifth generation cephalosporins or ESBLs | Cohort                      | Cohort | Retrospective | Germany               | High         | 01/2008 - 12/2010 | 1   | Charite University Hospital, Berlin, Germany                                                                     | No age restriction in sampling | nr   | 36   | 47   | 1) All-cause mortality, 2) Length of stay                       |

|                                                   |                                                       |                   |        |               |          |              |                         |     |                                                                                                       |                                |      |      |      |                                                                                        |
|---------------------------------------------------|-------------------------------------------------------|-------------------|--------|---------------|----------|--------------|-------------------------|-----|-------------------------------------------------------------------------------------------------------|--------------------------------|------|------|------|----------------------------------------------------------------------------------------|
| Leistner, R., <i>et al.</i> 2014. (91)            | Third/fourth/fifth generation cephalosporins or ESBLs | Cohort            | Cohort | Retrospective | Germany  | High         | 01/2008 - 12/2011       | 1   | Charite University Hospital, Berlin, Germany                                                          | No age restriction in sampling | 47.2 | nr   | nr   | 1) All-cause mortality                                                                 |
| Lim, C., <i>et al.</i> 2016. (45)                 | Multidrug resistance                                  | Not reported      | Cohort | Retrospective | Thailand | Upper-middle | 01/2004 - 12/2010       | ≥3  | 9 provincial hospitals in Northeast Thailand                                                          | No age restriction in sampling | nr   | nr   | nr   | 1) 30-day mortality, 2) All-cause mortality                                            |
| Ma, J., <i>et al.</i> 2017. (48)                  | Third/fourth/fifth generation cephalosporins or ESBLs | Case-control      | Cohort | Retrospective | China    | Upper-middle | 04/2012 - 07/2015       | 1   | Hematological center at The First Affiliated Hospital of Zhengzhou University                         | ≥ 14                           | nr   | 50   | 58.1 | 1) 30-day mortality, 2) All-cause mortality                                            |
| Martelius, T., <i>et al.</i> 2016. (56)           | Third/fourth/fifth generation cephalosporins or ESBLs | Surveillance      | Cohort | Prospective   | Finland  | High         | 01/1999 - 12/2013       | ≥ 3 | Started with 4 hospitals in 1999 and by 2013 there were 17 hospitals representing 12 health districts | No age restriction in sampling | nr   | 36.8 | 42.4 | 1) 30-day mortality, 2) All-cause mortality                                            |
| Maslikowska, J. A., <i>et al.</i> 2016. (93)      | Third/fourth/fifth generation cephalosporins or ESBLs | Case-control      | Cohort | Retrospective | Canada   | High         | 06/18/2010 - 04/05/2013 | 1   | Sunnybrook Health Sciences Centre                                                                     | No age restriction in sampling | nr   | nr   | nr   | 1) All-cause mortality, 2) Bacterium-attributable mortality, 3) Treatment failure,     |
| Melzer, M., <i>et al.</i> 2007. (65)              | Third/fourth/fifth generation cephalosporins or ESBLs | Not reported      | Cohort | Prospective   | UK       | High         | 06/2003 - 11/2005       | 1   | King George Hospital in Essex                                                                         | ≥ 16                           | 61.9 | 39.1 | 65.3 | 1) 30-day mortality, 2) All-cause mortality, 3) Post-infection length of hospital stay |
| Namikawa, H., <i>et al.</i> 2017. (96)            | Third/fourth/fifth generation cephalosporins or ESBLs | Not reported      | Cohort | Retrospective | Japan    | High         | 01/2011 - 06/2015       | 1   | Osaka City University Hospital                                                                        | No age restriction in sampling | nr   | 61.3 | 53.1 | 1) All-cause mortality                                                                 |
| Nicolas-Chanoine, M. H., <i>et al.</i> 2012. (86) | Third/fourth/fifth generation cephalosporins or ESBLs | Case-case-control | Cohort | Prospective   | France   | High         | 11/2008-06/2009         | ≥ 3 | 10 hospitals in the Assistance Publique-Hopitaux de Paris system                                      | No age restriction in sampling | nr   | 65   | 61   | 1) All-cause mortality                                                                 |
| Nussbaum, A., <i>et al.</i> 2018. (88)            | Third/fourth/fifth generation cephalosporins or ESBLs | Cohort            | Cohort | Retrospective | USA      | High         | 01/2007-12/2009         | 1   | New York Hospital Queens                                                                              | No age restriction in sampling | nr   | 44   | 42   | 1) All-cause mortality, 2) Length of hospital stay                                     |
| Ortega, M., <i>et al.</i> 2009. (58)              | Third/fourth/fifth generation cephalosporins or ESBLs | Surveillance      | Cohort | Prospective   | Spain    | High         | 01/1991 - 12/2007       | 1   | Hospital Clinic in Barcelona                                                                          | No age restriction in sampling | 54   | 56   | 54   | 1) 30-day mortality, 2) All-cause mortality                                            |
| Ortega, M., <i>et al.</i> 2009. (58)              | Quinolones                                            | Surveillance      | Cohort | Prospective   | Spain    | High         | 01/1991 - 12/2007       | 1   | Hospital Clinic in Barcelona                                                                          | No age restriction in sampling | 54   | 49   | 55   | 1) 30-day mortality, 2) All-cause mortality                                            |

|                                             |                                                       |                  |        |               |                   |              |                   |     |                                                                               |                                |      |      |      |                                                                          |
|---------------------------------------------|-------------------------------------------------------|------------------|--------|---------------|-------------------|--------------|-------------------|-----|-------------------------------------------------------------------------------|--------------------------------|------|------|------|--------------------------------------------------------------------------|
| Park, S. H., <i>et al.</i> 2011. (69)       | generation cephalosporins or ESBLs                    | Cohort           | Cohort | Retrospective | Republic of Korea | High         | 01/2005 - 12/2012 | 1   | Daejeon St. Mary's Hospital                                                   | ≥ 18                           | nr   | 76   | 70   | 1) 30-day mortality, 2) All-cause mortality                              |
| Park, S. H., <i>et al.</i> 2015. (94)       | Third/fourth/fifth generation cephalosporins or ESBLs | Case-control     | Cohort | Retrospective | Republic of Korea | High         | 01/2007 - 12/2013 | 1   | Daejeon St. Mary's Hospital                                                   | > 15                           | nr   | 88   | 93.8 | 1) All-cause mortality, 2) Treatment failure, 3) Length of hospital stay |
| Parveen, A., <i>et al.</i> 2015. (39)       | Multidrug resistance                                  | Not reported     | Cohort | Retrospective | Pakistan          | Lower-middle | 12/2012 - 11/2013 | 1   | Shaukat Khanum Memorial Cancer Hospital and Research Centre, Lahore, Pakistan | No age restriction in sampling | 34.8 | 25.5 | 41.2 | 1) 30-day mortality, 2) All-cause mortality                              |
| Pena, C., <i>et al.</i> 2008. (66)          | Third/fourth/fifth generation cephalosporins or ESBLs | Cohort           | Cohort | Retrospective | Spain             | High         | 01/1996 - 12/2003 | 1   | Hospital Universitari de Bellvitge, hospital for adult patients               | ≥ 18                           | nr   | 46   | nr   | 1) 30-day mortality, 2) All-cause mortality                              |
| Peralta, G., <i>et al.</i> 2007. (57)       | Third/fourth/fifth generation cephalosporins or ESBLs | Cohort           | Cohort | Retrospective | Spain             | High         | 01/1997 - 06/2005 | 1   | Sierrallana Hospital in Torrelavega, Spain                                    | ≥ 14                           | 48.9 | nr   | nr   | 1) All-cause mortality                                                   |
| Peralta, G., <i>et al.</i> 2007. (57)       | Quinolones                                            | Cohort           | Cohort | Retrospective | Spain             | High         | 01/1997 - 06/2005 | 1   | Sierrallana Hospital, Torrelavega, Spain                                      | ≥ 14                           | 48.9 | nr   | nr   | 1) All-cause mortality                                                   |
| Riu, M., <i>et al.</i> 2016. (55)           | Multidrug resistance                                  | Not reported     | Cohort | Retrospective | Spain             | High         | 01/2005 - 12/2012 | 1   | Hospital del Mar, Barcelona                                                   | No age restriction in sampling | nr   | nr   | nr   | 1) Healthcare system costs                                               |
| Rodriguez-Bano, J. <i>et al.</i> 2010. (83) | Third/fourth/fifth generation cephalosporins or ESBLs | Case-control     | Cohort | Prospective   | Spain             | High         | 10/2004 - 01/2006 | ≥ 3 | 13 tertiary hospitals                                                         | ≥ 14                           | nr   | 44   | 56   | 1) All-cause mortality                                                   |
| Shin, J., <i>et al.</i> 2012. (106)         | Quinolones                                            | Cohort           | Cohort | Retrospective | Republic of Korea | High         | 01/2008- 12/2008  | ≥ 3 | 14 hospitals in South Korea                                                   | No age restriction in sampling | nr   | 100  | 98.8 | 1) All-cause mortality, 2) Treatment failure, 3) Length of hospital stay |
| Soraas, A., <i>et al.</i> 2014. (109)       | Third/fourth/fifth generation cephalosporins or ESBLs | Population-based | Cohort | Prospective   | Norway            | High         | 02/2009- 05/2012  | 1   | Vestre Viken Hospital Trust, Department of Medical Microbiology               | ≥ 18                           | 87   | nr   | nr   | 1) Treatment failure                                                     |
| Thaden, J. T., <i>et al.</i> 2017. (63)     | Multidrug resistance                                  | Cohort           | Cohort | Prospective   | USA               | High         | 01/2009 - 12/2015 | 1   | Duke University Medical Centre                                                | ≥ 18                           | nr   | nr   | nr   | 1) Healthcare system costs                                               |
| Trecarichi, E. M., <i>et al.</i> 2009. (59) | Third/fourth/fifth generation cephalosporins or ESBLs | Cohort           | Cohort | Prospective   | Italy             | High         | 01/2000- 12/2007  | 1   | The Catholic University Hospital, Rome, Italy                                 | ≥ 17                           | 43.6 | 50   | 38.9 | 1) 30-day mortality, 2) All-cause mortality                              |



|                                             |                                                       |               |        |               |                   |      |                   |          |                                                                    |                                |      |      |      |                                                                                                                     |
|---------------------------------------------|-------------------------------------------------------|---------------|--------|---------------|-------------------|------|-------------------|----------|--------------------------------------------------------------------|--------------------------------|------|------|------|---------------------------------------------------------------------------------------------------------------------|
| Trecarichi, E. M., <i>et al.</i> 2009. (59) | Quinolones                                            | Cohort        | Cohort | Retrospective | Italy             | High | 01/2000-12/2007   | 1        | Catholic University Hospital, Rome, Italy                          | $\geq 17$                      | 43.6 | 46.2 | 39.2 | 1) 30-day mortality, 2) All-cause mortality                                                                         |
| Tumbarello, M., <i>et al.</i> 2010. (84)    | Third/fourth/fifth generation cephalosporins or ESBLs | Cohort        | Cohort | Retrospective | Italy             | High | 01/2006-12/2006   | 1        | The Catholic University Hospital, Rome, Italy                      | $\geq 18$                      | 51.5 | 51.4 | 51.6 | 1) All-cause mortality, 2) Treatment failure, 3) Post-infection length of hospital stay, 4) Healthcare system costs |
| Uzodi, A. S., <i>et al.</i> 2017. (62)      | Multidrug resistance                                  | Cohort        | Cohort | Retrospective | USA               | High | 01/2012-12/2012   | 1        | Mayo Clinic Children's Hospital, Rochester, MN                     | $\leq 18$                      | nr   | nr   | nr   | 1) All-cause mortality, 2) Treatment failure, 3) Length of hospital stay                                            |
| Van Aken, S., <i>et al.</i> 2014. (92)      | Third/fourth/fifth generation cephalosporins or ESBLs | Case-control  | Cohort | Retrospective | Sweden            | High | 01/2011-09/2012   | $\geq 3$ | All hospitals in Skane county, did not provide the specific number | No age restriction in sampling | 49   | 42.9 | 52.1 | 1) All-cause mortality, 2) Length of hospital stay                                                                  |
| Yip, T., <i>et al.</i> 2006. (81)           | Third/fourth/fifth generation cephalosporins or ESBLs | Not reported  | Cohort | Retrospective | Hong Kong         | High | 10/1994 - 08/2003 | 1        | Tung Wah Hospital, Hong Kong                                       | No age restriction in sampling | nr   | 72.7 | 64.9 | 1) All-cause mortality, 2) Treatment failure                                                                        |
| Yoon, E. J., <i>et al.</i> 2018. (61)       | Third/fourth/fifth generation cephalosporins or ESBLs | Observational | Cohort | Prospective   | Republic of Korea | High | 05/2016 - 04/2017 | $\geq 3$ | Six general hospitals in South Korea                               | No age restriction in sampling | 60.3 | nr   | nr   | 1) 30-day mortality, 2) All-cause mortality                                                                         |
| Yoon, E. J., <i>et al.</i> 2018. (61)       | Quinolones                                            | Observational | Cohort | Prospective   | Republic of Korea | High | 05/2016 - 04/2017 | $\geq 3$ | Six general hospitals in South Korea                               | No age restriction in sampling | 60.3 | nr   | nr   | 1) 30-day mortality, 2) All-cause mortality                                                                         |
| Yoon, E. J., <i>et al.</i> 2018. (61)       | Multidrug resistance                                  | Observational | Cohort | Prospective   | Republic of Korea | High | 05/2016 - 04/2017 | $\geq 3$ | Six general hospitals in South Korea                               | No age restriction in sampling | 60.3 | nr   | nr   | 1) 30-day mortality, 2) All-cause mortality                                                                         |
