# Supplementary material for: Evaluation of the health and healthcare system burden due to antimicrobial-resistant Escherichia coli infections in humans: a systematic review and meta-analysis
Source: PubMed Central journal article supplement (PMC7726913; doi:10.1186/s13756-020-00863-x), 2020-12-10
Supplement: 13756_2020_863_MOESM8_ESM.pdf [file 13756_2020_863_MOESM8_ESM.pdf]

**Additional file 8 - Results for 30-day mortality and the type of resistance of interest for a systematic review evaluating whether the measures of health or healthcare system burden increase in humans with antimicrobial-resistant *E. coli* infections.**

| Citation<br>(Reference # in<br>manuscript)           | Deaths in<br>resistant (R)<br>group | Total in<br>R | Deaths in<br>susceptible (S)<br>group | Total in<br>S | Odds<br>ratio<br>(OR) | 95%<br>Confidence<br>interval | OR calculated<br>from raw data<br>or extracted<br>from study | Crude or<br>adjusted<br>OR | Details of multivariable<br>logistic regression                                                                                                   | Details of matching                                                                                            | $\beta$ (Coefficient) | Standard<br>error | Comments                                  |
|------------------------------------------------------|-------------------------------------|---------------|---------------------------------------|---------------|-----------------------|-------------------------------|--------------------------------------------------------------|----------------------------|---------------------------------------------------------------------------------------------------------------------------------------------------|----------------------------------------------------------------------------------------------------------------|-----------------------|-------------------|-------------------------------------------|
| <b>8a) Third-generation cephalosporin resistance</b> |                                     |               |                                       |               |                       |                               |                                                              |                            |                                                                                                                                                   |                                                                                                                |                       |                   |                                           |
| Abermethyl JK,<br>2015 (50)                          | 392                                 | 1838          | 2911                                  | 16641         | <b>1.28</b>           | <b>1.14-1.44</b>              | Extracted                                                    | Crude                      | n/a                                                                                                                                               | n/a                                                                                                            | 0.247                 | 0.060             |                                           |
| Cheong HS, 2007<br>(60)                              | 5                                   | 19            | 64                                    | 489           | 2.37                  | 0.86-6.57                     | Calculated                                                   | Crude                      | n/a                                                                                                                                               | n/a                                                                                                            | 0.863                 | 0.519             |                                           |
| de Kraker ME,<br>2011 (49)                           | 34                                  | 105           | 180                                   | 1067          | <b>2.36</b>           | <b>1.53-3.65</b>              | Calculated                                                   | Crude                      | n/a                                                                                                                                               | n/a                                                                                                            | 0.859                 | 0.222             |                                           |
| Denis B, 2015<br>(74)                                | 12                                  | 41            | 11                                    | 41            | 1.23                  | 0.36-4.23                     | Extracted                                                    | Adjusted                   | Adjusted for APACHE II<br>score (severity)                                                                                                        | Matched on date of<br>diagnosis                                                                                | 0.207                 | 0.629             |                                           |
| Esteve-Palau E,<br>2015 (75)                         | 6                                   | 60            | 4                                     | 60            | 1.56                  | 0.44-5.43                     | Calculated                                                   | Crude                      | n/a                                                                                                                                               | Matched on age, sex,<br>and date of admission                                                                  | 0.445                 | 0.641             |                                           |
| Freeman JT, 2012<br>(70)                             | 10                                  | 16            | 2                                     | 16            | <b>11.67</b>          | <b>2.1-61.93</b>              | Calculated                                                   | Crude                      | n/a                                                                                                                                               | Matched on species of<br>organism, type of blood<br>culture, timing of<br>bacteremia, and data of<br>diagnosis | 2.457                 | 0.863             |                                           |
| Gudiol C, 2010<br>(67)                               | 6                                   | 17            | 23                                    | 118           | 2.25                  | 0.78-6.54                     | Calculated                                                   | Crude                      | n/a                                                                                                                                               | n/a                                                                                                            | 0.811                 | 0.542             | Results are for<br>episodes not patients. |
| Ha YE, 2013 (72)                                     | 21                                  | 95            | 31                                    | 255           | <b>3.01</b>           | <b>1.45-6.28</b>              | Extracted                                                    | Adjusted                   | Adjusted for septic<br>shock, mechanical<br>ventilation, source from<br>UTI, source from intra-<br>abdominal, source from<br>respiratory, and CCI | n/a                                                                                                            | 1.102                 | 0.374             |                                           |
| Haruki Y, 2018<br>(76)                               | 9                                   | 24            | 12                                    | 77            | <b>3.25</b>           | <b>1.19-8.96</b>              | Extracted                                                    | Crude                      | n/a                                                                                                                                               | n/a                                                                                                            | 1.179                 | 0.515             |                                           |
| Ho PL, 2002 (64)                                     | 9                                   | 50            | 7                                     | 100           | <b>2.92</b>           | <b>1.05-8.1</b>               | Calculated                                                   | Crude                      | n/a                                                                                                                                               | Matched on specialty,<br>age (+/- 10 yr), sex, and<br>date of isolation                                        | 1.072                 | 0.521             | Results are for<br>episodes not patients. |
| Hsieh CJ, 2010<br>(68)                               | 4                                   | 19            | 42                                    | 385           | 2.18                  | 0.73-6.57                     | Calculated                                                   | Crude                      | n/a                                                                                                                                               | n/a                                                                                                            | 0.779                 | 0.561             |                                           |

|                                 |     |      |      |       |      |            |            |          |                                                                                                                                                                     |                                                     |        |       |  |
|---------------------------------|-----|------|------|-------|------|------------|------------|----------|---------------------------------------------------------------------------------------------------------------------------------------------------------------------|-----------------------------------------------------|--------|-------|--|
| Kang CI, 2010 (51)              | 6   | 40   | 39   | 516   | 2.99 | 1.01-8.84  | Extracted  | Adjusted | Adjusted for severe sepsis, higher Pitt bacteremia score, primary bacteremia, pneumonia, and underlying liver disease                                               | n/a                                                 | 1.095  | 0.553 |  |
| Kang CI, 2011 (52)              | 3   | 29   | 19   | 175   | 0.95 | 0.28-3.23  | Calculated | Crude    | n/a                                                                                                                                                                 | n/a                                                 | -0.051 | 0.624 |  |
| Kang CI, 2012 (71)              | 8   | 108  | 2    | 100   | 3.92 | 0.81-18.92 | Calculated | Crude    | n/a                                                                                                                                                                 | n/a                                                 | 1.366  | 0.804 |  |
| Kim SH, 2013 (73)               | 1   | 15   | 3    | 72    | 1.64 | 0.16-16.97 | Calculated | Crude    | n/a                                                                                                                                                                 | n/a                                                 | 0.495  | 1.190 |  |
| Ma J, 2017 (48)                 | 15  | 70   | 6    | 43    | 1.68 | 0.61-4.58  | Calculated | Crude    | n/a                                                                                                                                                                 | n/a                                                 | 0.519  | 0.514 |  |
| Martelius T, 2016 (56)          | 26  | 182  | 243  | 2035  | 1.23 | 0.8-1.9    | Calculated | Crude    | n/a                                                                                                                                                                 | n/a                                                 | 0.207  | 0.221 |  |
| Melzer M, 2007 (65)             | 28  | 46   | 73   | 308   | 3.57 | 1.48-8.6   | Extracted  | Adjusted | Adjusted for age, sex, site of infection, hospital or community-acquired infection, presence in ICU, hypotension at time of bacteremia, malignancy, and neutropenia | n/a                                                 | 1.273  | 0.449 |  |
| Ortega M, 2009 (58)             | 33  | 211  | 407  | 4547  | 1.89 | 1.29-2.77  | Calculated | Crude    | n/a                                                                                                                                                                 | n/a                                                 | 0.637  | 0.195 |  |
| Park SH, 2011 (94)              | 9   | 50   | 8    | 100   | 6.4  | 0.3-145.5  | Extracted  | Adjusted | Adjusted for severe sepsis or septic shock, malignancy, and severity of illness (APACHE II score)                                                                   | Matched on date diagnosis                           | 1.856  | 1.578 |  |
| Pena C, 2008 (66)               | 25  | 100  | 11   | 100   | 2.7  | 1.26-5.77  | Calculated | Crude    | n/a                                                                                                                                                                 | Matched on site of infection, and date of admission | 0.993  | 0.388 |  |
| Trecarichi EM, 2009 (59)        | 11  | 26   | 2    | 36    | 8.84 | 1.48-52.91 | Extracted  | Adjusted | Adjusted for inadequate initial antimicrobial therapy and prolonged neutropenia                                                                                     | n/a                                                 | 2.179  | 0.912 |  |
| Yoon EJ, 2018 (61)              | 67  | 524  | 74   | 968   | 1.77 | 1.25-2.51  | Calculated | Crude    | n/a                                                                                                                                                                 | n/a                                                 | 0.571  | 0.178 |  |
| <b>8b) Quinolone resistance</b> |     |      |      |       |      |            |            |          |                                                                                                                                                                     |                                                     |        |       |  |
| Abermethy JK, 2015 (50)         | 797 | 3647 | 2853 | 16828 | 1.37 | 1.25-1.5   | Extracted  | Crude    | n/a                                                                                                                                                                 | n/a                                                 | 0.315  | 0.047 |  |
| Camins BC, 2011 (78)            | 24  | 93   | 7    | 93    | 3.9  | 1.5-10.2   | Extracted  | Adjusted | Conditional and adjusted for cirrhosis, cardiac dysfunction, and female gender                                                                                      | Match on year of diagnosis                          | 1.361  | 0.489 |  |

|                          |       |      |       |      |      |            |            |          |                                                                                                                                                                                                                                                                                                                    |                                   |       |       |                                                                                                                             |
|--------------------------|-------|------|-------|------|------|------------|------------|----------|--------------------------------------------------------------------------------------------------------------------------------------------------------------------------------------------------------------------------------------------------------------------------------------------------------------------|-----------------------------------|-------|-------|-----------------------------------------------------------------------------------------------------------------------------|
| Cheong HS, 2007 (60)     | 22    | 132  | 47    | 376  | 1.4  | 0.81-2.42  | Calculated | Crude    | n/a                                                                                                                                                                                                                                                                                                                | n/a                               | 0.336 | 0.279 |                                                                                                                             |
| Eom JS, 2002 (77)        | 7     | 60   | 2     | 80   | 5.15 | 1.03-25.76 | Calculated | Crude    | n/a                                                                                                                                                                                                                                                                                                                | n/a                               | 1.639 | 0.821 |                                                                                                                             |
| Huotari K, 2003 (54)     | 2.40% | 51   | 5.50% | 102  | nr   | nr         | n/a        | n/a      | n/a                                                                                                                                                                                                                                                                                                                | Matched on same type of infection | n/a   | n/a   | Excluded from MA because the numbers for mortality don't multiply to a whole number. Mortality was reported in percentages. |
| Kim J, 2014 (79)         | 11    | 26   | 23    | 56   | 1.05 | 0.42-2.67  | Calculated | Crude    | n/a                                                                                                                                                                                                                                                                                                                | n/a                               | 0.049 | 0.472 |                                                                                                                             |
| Ortega M, 2009 (58)      | 161   | 1300 | 279   | 3458 | 1.61 | 1.31-1.98  | Calculated | Crude    | n/a                                                                                                                                                                                                                                                                                                                | n/a                               | 0.476 | 0.105 |                                                                                                                             |
| Trecarichi EM, 2009 (59) | 12    | 39   | 1     | 23   | 9.78 | 1.18-81.15 | Extracted  | Crude    | n/a                                                                                                                                                                                                                                                                                                                | n/a                               | 2.280 | 1.079 |                                                                                                                             |
| Yoon EJ, 2018 (61)       | 69    | 590  | 72    | 902  | 1.53 | 1.08-2.16  | Calculated | Crude    | n/a                                                                                                                                                                                                                                                                                                                | n/a                               | 0.425 | 0.177 |                                                                                                                             |
| <b>8c) MDR</b>           |       |      |       |      |      |            |            |          |                                                                                                                                                                                                                                                                                                                    |                                   |       |       |                                                                                                                             |
| Cheong HS, 2007 (60)     | 26    | 137  | 43    | 371  | 1.81 | 0.73-4.48  | Extracted  | Adjusted | Adjusted for CCI, UTI, presentation with acute renal failure, Pitt bacteremia score, and healthcare-associated.                                                                                                                                                                                                    | n/a                               | 0.593 | 0.463 |                                                                                                                             |
| Lim C, 2016 (45)         | 645   | 1717 | 697   | 2562 | 1.61 | 1.41-1.83  | Calculated | Crude    | n/a                                                                                                                                                                                                                                                                                                                | n/a                               | 0.476 | 0.067 |                                                                                                                             |
| Parveen A, 2015 (39)     | 44    | 98   | 36    | 129  | 1.85 | 0.89-3.86  | Extracted  | Adjusted | Adjusted for gender, hematological malignancy, hospitalization within 30 days prior to BSI, admission to ICU, previous chemo within 30 day, previous sx with 30 day, previous radiation within 30 day, neutropenia (<100 cells/mm <sup>3</sup> ), co-morbidities, effectiveness of antimicrobial therapy, and age. | n/a                               | 0.615 | 0.374 |                                                                                                                             |

|                       |    |     |    |     |             |                  |            |       |     |  |     |       |       |                                                                                                                                                                                                                                                                                                 |
|-----------------------|----|-----|----|-----|-------------|------------------|------------|-------|-----|--|-----|-------|-------|-------------------------------------------------------------------------------------------------------------------------------------------------------------------------------------------------------------------------------------------------------------------------------------------------|
| Yoon EJ, 2018<br>(61) | 97 | 865 | 44 | 627 | <b>1.67</b> | <b>1.16-2.42</b> | Calculated | Crude | n/a |  | n/a | 0.513 | 0.188 | Study used multivariable cox proportional hazard regression to report HR 1.59; 95% CI 1.1-2.29; adjusted for critically ill, polymicrobial infection of urinary tract, primary infection of peritoneum, moderate to severe kidney disease, chronic liver disease, WBC, and sfa/foc for adhesion |
|-----------------------|----|-----|----|-----|-------------|------------------|------------|-------|-----|--|-----|-------|-------|-------------------------------------------------------------------------------------------------------------------------------------------------------------------------------------------------------------------------------------------------------------------------------------------------|
