# Supplementary material for: Evaluation of the health and healthcare system burden due to antimicrobial-resistant Escherichia coli infections in humans: a systematic review and meta-analysis
Source: PubMed Central journal article supplement (PMC7726913; doi:10.1186/s13756-020-00863-x), 2020-12-10
Supplement: 13756_2020_863_MOESM11_ESM.pdf [file 13756_2020_863_MOESM11_ESM.pdf]

**Additional file 11 - Results for all-cause mortality and the type of resistance of interest for a systematic review evaluating whether the measures of health or healthcare system burden increase in humans with antimicrobial-resistant *E. coli* infections.**

| Citation<br>(Reference # in<br>manuscript)            | All-cause<br>definition              | Deaths in<br>resistant (R)<br>group | Total in<br>R | Deaths in<br>susceptible (S)<br>group | Total in<br>S | Odds<br>ratio<br>(OR) | 95%<br>Confidence<br>interval | OR calculated<br>from raw data<br>or extracted<br>from study | Crude or<br>adjusted | Details of<br>multivariable<br>logistic regression                                                                                                                             | Details of<br>matching           | $\beta$ (coefficient) | Standard<br>error | Comments |
|-------------------------------------------------------|--------------------------------------|-------------------------------------|---------------|---------------------------------------|---------------|-----------------------|-------------------------------|--------------------------------------------------------------|----------------------|--------------------------------------------------------------------------------------------------------------------------------------------------------------------------------|----------------------------------|-----------------------|-------------------|----------|
| <b>11a) Third-generation cephalosporin resistance</b> |                                      |                                     |               |                                       |               |                       |                               |                                                              |                      |                                                                                                                                                                                |                                  |                       |                   |          |
| Abermethyl JK,<br>2015 (49)                           | 30-day all<br>cause                  | 392                                 | 1838          | 2911                                  | 16641         | <b>1.28</b>           | <b>1.14-1.44</b>              | Extracted                                                    | Crude                | n/a                                                                                                                                                                            | n/a                              | 0.247                 | 0.060             |          |
| Al-Otaibi FE,<br>2013 (86)                            | deaths (no<br>definition)            | 10                                  | 113           | 2                                     | 226           | <b>10.87</b>          | <b>2.34-50.52</b>             | Calculated                                                   | Crude                | n/a                                                                                                                                                                            | n/a                              | 2.386                 | 0.784             |          |
| Alvarez-Uria G,<br>2012 (37)                          | 21-day all<br>cause                  | 24                                  | 154           | 2                                     | 40            | <b>8.24</b>           | <b>1.19-57.28</b>             | Extracted                                                    | Adjusted             | Adjusted for sex,<br>HIV infection,<br>isolation from a<br>normally sterile<br>site, and age                                                                                   | n/a                              | 2.109                 | 0.988             |          |
| Anunnatsiri S,<br>2012 (42)                           | overall in-<br>hospital<br>mortality | 9                                   | 32            | 13                                    | 113           | <b>7.76</b>           | <b>1.84-32.72</b>             | Extracted                                                    | Adjusted             | Adjusted for<br>APACHE II score<br>(severity score at<br>time of culture or<br>within 24 hr),<br>primary septicemia,<br>and secondary<br>septicemia from<br>non-urinary source | n/a                              | 2.049                 | 0.734             |          |
| Apisarnthana-rak<br>A, 2008 (43)                      | in-hospital<br>crude mortality       | 14                                  | 46            | 9                                     | 138           | <b>6.27</b>           | <b>2.54-15.48</b>             | Calculated                                                   | Crude                | n/a                                                                                                                                                                            | n/a                              | 1.836                 | 0.461             |          |
| Artero A, 2017<br>(95)                                | in-hospital all-<br>cause            | 11                                  | 85            | 17                                    | 225           | 1.82                  | 0.83-4.00                     | Calculated                                                   | Crude                | n/a                                                                                                                                                                            | n/a                              | 0.599                 | 0.401             |          |
| Chakraborty A,<br>2012 (38)                           | expired (no<br>definition)           | 21                                  | 132           | 1                                     | 67            | <b>12.49</b>          | <b>1.64-94.99</b>             | Calculated                                                   | Crude                | n/a                                                                                                                                                                            | n/a                              | 2.525                 | 1.035             |          |
| Cheong HS, 2007<br>(60)                               | 30-day                               | 5                                   | 19            | 64                                    | 489           | 2.37                  | 0.86-6.57                     | Calculated                                                   | Crude                | n/a                                                                                                                                                                            | n/a                              | 0.863                 | 0.519             |          |
| Cornejo-Juarez P,<br>2012 (44)                        | 60-day                               | 51                                  | 88            | 51                                    | 88            | 1                     | 0.55-1.82                     | Calculated                                                   | Crude                | n/a                                                                                                                                                                            | Matching details<br>not provided | 0.000                 | 0.305             |          |

|                                |             |    |     |     |      |              |                  |            |          |                                                                                                                                   |                                                                                                    |       |       |                                                                                                |
|--------------------------------|-------------|----|-----|-----|------|--------------|------------------|------------|----------|-----------------------------------------------------------------------------------------------------------------------------------|----------------------------------------------------------------------------------------------------|-------|-------|------------------------------------------------------------------------------------------------|
| Courpon-Claudinon A, 2011 (85) | in-hospital | 12 | 39  | 124 | 1012 | <b>3.18</b>  | <b>1.59-6.37</b> | Calculated | Crude    | n/a                                                                                                                               | n/a                                                                                                | 1.157 | 0.354 |                                                                                                |
| de Kraker ME, 2011 (49)        | In-hospital | 39 | 109 | 190 | 1101 | <b>2.67</b>  | <b>1.76-4.06</b> | Calculated | Crude    | n/a                                                                                                                               | n/a                                                                                                | 0.982 | 0.213 |                                                                                                |
| Denis B, 2015 (74)             | 30-day      | 12 | 41  | 11  | 41   | 1.23         | 0.36-4.23        | Extracted  | Adjusted | Adjusted for APACHE II score (severity)                                                                                           | Matched on date of diagnosis                                                                       | 0.207 | 0.629 |                                                                                                |
| Esteve-Palau E, 2015 (75)      | 30-day      | 6  | 60  | 4   | 60   | 1.56         | 0.44-5.43        | Calculated | Crude    | n/a                                                                                                                               | Matched on age, sex, and date of admission                                                         | 0.445 | 0.641 |                                                                                                |
| Freeman JT, 2012 (70)          | 30-day      | 10 | 16  | 2   | 16   | <b>11.67</b> | <b>2.1-61.93</b> | Calculated | Crude    | n/a                                                                                                                               | Matched on species of organism, type of blood culture, timing of bacteremia, and date of diagnosis | 2.457 | 0.863 | Additionally reported 8-day mortality                                                          |
| Gudiol C, 2010 (67)            | 30-day      | 6  | 17  | 23  | 118  | 2.25         | 0.78-6.54        | Calculated | Crude    | n/a                                                                                                                               | n/a                                                                                                | 0.811 | 0.542 | The outcomes are presented for episodes not patients and additionally reported 7-day mortality |
| Ha YE, 2013 (72)               | 30-day      | 21 | 95  | 31  | 255  | <b>3.01</b>  | <b>1.45-6.28</b> | Extracted  | Adjusted | Adjusted for septic shock, mechanical ventilation, source from UTI, source from intra-abdominal, source from respiratory, and CCI | n/a                                                                                                | 1.102 | 0.374 |                                                                                                |
| Haruki Y, 2018 (76)            | 28-day      | 9  | 24  | 12  | 77   | <b>3.25</b>  | <b>1.18-8.96</b> | Calculated | Crude    | n/a                                                                                                                               | n/a                                                                                                | 1.179 | 0.517 |                                                                                                |
| Henshke-Bar-Meir R, 2006 (80)  | in-hospital | 10 | 39  | 14  | 119  | <b>2.59</b>  | <b>1.06-6.33</b> | Calculated | Crude    | n/a                                                                                                                               | n/a                                                                                                | 0.952 | 0.456 |                                                                                                |
| Ho PL, 2002 (64)               | 30-day      | 9  | 50  | 7   | 100  | <b>2.92</b>  | <b>1.05-8.10</b> | Calculated | Crude    | n/a                                                                                                                               | Matched on specialty, age (+/- 10 yr), sex and date of isolation                                   | 1.072 | 0.521 | The outcomes are presented for episodes not patients.                                          |

|                       |             |    |     |     |      |             |                   |            |          |                                                                                                                       |                                                                      |        |       |                                                            |
|-----------------------|-------------|----|-----|-----|------|-------------|-------------------|------------|----------|-----------------------------------------------------------------------------------------------------------------------|----------------------------------------------------------------------|--------|-------|------------------------------------------------------------|
| Hsieh CJ, 2010 (68)   | 30-day      | 4  | 19  | 42  | 385  | 2.18        | 0.73-6.57         | Calculated | Crude    | n/a                                                                                                                   | n/a                                                                  | 0.779  | 0.561 | Additionally reported 3-day, 15-day and crude mortality.   |
| Huang YY, 2018 (97)   | in-hospital | 7  | 58  | 4   | 118  | <b>3.91</b> | <b>1.16-13.07</b> | Calculated | Crude    | n/a                                                                                                                   | n/a                                                                  | 1.364  | 0.618 |                                                            |
| Kang CI, 2010 (51)    | 30-day      | 6  | 40  | 36  | 516  | <b>2.99</b> | <b>1.01-8.84</b>  | Extracted  | Adjusted | Adjusted for severe sepsis, higher Pitt bacteremia score, primary bacteremia, pneumonia, and underlying liver disease | n/a                                                                  | 1.095  | 0.553 |                                                            |
| Kang CI, 2011 (52)    | 30-day      | 3  | 29  | 19  | 175  | 0.95        | 0.28-3.23         | Calculated | Crude    | n/a                                                                                                                   | n/a                                                                  | -0.051 | 0.624 |                                                            |
| Kang CI, 2012 (71)    | 30-day      | 8  | 108 | 2   | 100  | 3.92        | 0.81-18.92        | Calculated | Crude    | n/a                                                                                                                   | n/a                                                                  | 1.366  | 0.804 |                                                            |
| Kaya O, 2013 (46)     | in-hospital | 16 | 44  | 19  | 69   | 1.5         | 0.67-3.38         | Extracted  | Crude    | n/a                                                                                                                   | n/a                                                                  | 0.405  | 0.413 |                                                            |
| Khan FY, 2010 (82)    | in-hospital | 14 | 27  | 9   | 70   | <b>7.3</b>  | <b>2.65-20.14</b> | Calculated | Crude    | n/a                                                                                                                   | n/a                                                                  | 1.988  | 0.517 |                                                            |
| Kim SH, 2013 (73)     | 7-day       | 0* | 15* | 1*  | 72*  | 1.54        | 0.06-39.55        | Calculated | Crude    | n/a                                                                                                                   | n/a                                                                  | 0.432  | 1.656 | *Continuity correction added 0.5 to all cells of 2X2 table |
| Komatsu Y, 2018 (98)  | 14-day      | 6  | 30  | 4   | 85   | <b>4.97</b> | <b>1.08-26.01</b> | Extracted  | Crude    | n/a                                                                                                                   | n/a                                                                  | 1.603  | 0.812 |                                                            |
| Lambert ML, 2011 (53) | in ICU      | 21 | 42  | 86  | 217  | 1.52        | 0.79-2.94         | Calculated | Crude    | n/a                                                                                                                   | n/a                                                                  | 0.419  | 0.335 |                                                            |
| Lee H, 2018 (99)      | in-hospital | 0* | 50* | 2*  | 100* | 0.39        | 0.018-8.28        | Calculated | Crude    | n/a                                                                                                                   | Matched on sex and age (+/- 5 years)                                 | -0.942 | 1.564 | *Continuity correction added 0.5 to all cells of 2X2 table |
| Lee S, 2014 (89)      | 14-day      | 0* | 26* | 0*  | 52*  | 1.98        | 0.04-102.6        | Calculated | Crude    | n/a                                                                                                                   | Matched on bacteremia, age, sex, CCI, SAPS II and modified APN score | 0.683  | 2.002 | *Continuity correction added 0.5 to all cells of 2X2 table |
| Leistner R, 2014 (90) | in-hospital | 30 | 115 | 181 | 983  | 1.56        | 1.00-2.44         | Calculated | Crude    | n/a                                                                                                                   | n/a                                                                  | 0.445  | 0.228 |                                                            |
| Leistner R, 2014 (91) | In-hospital | 45 | 178 | 233 | 1321 | <b>1.58</b> | <b>1.10-2.28</b>  | Calculated | Crude    | n/a                                                                                                                   | n/a                                                                  | 0.457  | 0.186 |                                                            |
| Ma J, 2017 (48)       | 30-day      | 15 | 70  | 6   | 43   | 1.68        | 0.61-4.58         | Calculated | Crude    | n/a                                                                                                                   | n/a                                                                  | 0.519  | 0.514 |                                                            |

|                                |                                                                                    |    |     |     |      |             |                   |            |          |                                                                                                                                                                     |                                                     |        |       |                                        |
|--------------------------------|------------------------------------------------------------------------------------|----|-----|-----|------|-------------|-------------------|------------|----------|---------------------------------------------------------------------------------------------------------------------------------------------------------------------|-----------------------------------------------------|--------|-------|----------------------------------------|
| Martelius T, 2016 (56)         | 7-day                                                                              | 14 | 182 | 121 | 2035 | 1.32        | 0.75-2.33         | Calculated | Crude    | n/a                                                                                                                                                                 | n/a                                                 | 0.278  | 0.289 |                                        |
| Maslikowska JA, 2016 (93)      | All-cause deaths upto and including 14-days after completion of antibiotic therapy | 9  | 61  | 1   | 49   | <b>8.31</b> | <b>1.01-68.04</b> | Calculated | Crude    | n/a                                                                                                                                                                 | n/a                                                 | 2.117  | 1.074 |                                        |
| Melzer M, 2007 (65)            | 30-day                                                                             | 28 | 46  | 73  | 308  | <b>3.57</b> | <b>1.48-8.60</b>  | Extracted  | Adjusted | Adjusted for age, sex, site of infection, hospital or community-acquired infection, presence in ICU, hypotension at time of bacteremia, malignancy, and neutropenia | n/a                                                 | 1.273  | 0.449 |                                        |
| Namikawa H, 2017 (96)          | all-cause deaths                                                                   | 3  | 31  | 9   | 98   | 1.06        | 0.29-3.91         | Calculated | Crude    | n/a                                                                                                                                                                 | n/a                                                 | 0.058  | 0.664 |                                        |
| Nicolas-Chanoine MH, 2012 (86) | in-hospital                                                                        | 18 | 152 | 11  | 152  | 1.72        | 0.80-3.72         | Calculated | Crude    | n/a                                                                                                                                                                 | Matched on time of diagnosis                        | 0.542  | 0.392 |                                        |
| Nussbaum A, 2013 (88)          | in-hospital                                                                        | 9  | 34  | 11  | 66   | 1.8         | 0.68-4.8          | Calculated | Crude    | n/a                                                                                                                                                                 | Matched on age and gender                           | 0.588  | 0.499 |                                        |
| Ortega M, 2009 (58)            | 30-day                                                                             | 33 | 211 | 407 | 4547 | <b>1.89</b> | <b>1.29-2.77</b>  | Calculated | Crude    | n/a                                                                                                                                                                 | n/a                                                 | 0.637  | 0.195 |                                        |
| Park SH, 2011 (69)             | 7-day                                                                              | 4  | 50  | 6   | 100  | 1.36        | 0.39-4.74         | Calculated | Crude    | n/a                                                                                                                                                                 | Matched on data of diagnosis                        | 0.307  | 0.637 |                                        |
| Park SH, 2015 (94)             | death within 4 wks after completion of antibiotic therapy                          | 1  | 75  | 4   | 225  | 0.75        | 0.08-6.79         | Calculated | Crude    | n/a                                                                                                                                                                 | Matched on month of diagnosis                       | -0.288 | 1.133 |                                        |
| Pena C, 2008 (66)              | 30-day                                                                             | 25 | 100 | 11  | 100  | <b>2.7</b>  | <b>1.26-5.77</b>  | Calculated | Crude    | n/a                                                                                                                                                                 | Matched on site of infection, and date of admission | 0.993  | 0.388 | Additionally, reported 7-day mortality |
| Peralta G, 2007 (57)           | in-hospital                                                                        | 6  | 31  | 30  | 632  | <b>4.82</b> | <b>1.89-12.32</b> | Calculated | Crude    | n/a                                                                                                                                                                 | n/a                                                 | 1.573  | 0.478 |                                        |

|                                  |                                         |     |      |      |       |      |            |            |          |                                                                                 |                                                                                         |        |       |                                                       |
|----------------------------------|-----------------------------------------|-----|------|------|-------|------|------------|------------|----------|---------------------------------------------------------------------------------|-----------------------------------------------------------------------------------------|--------|-------|-------------------------------------------------------|
| Rodriguez-Bano J, 2010 (83)      | 14-day                                  | 16  | 98   | 15   | 187   | 2.24 | 1.07-4.69  | Calculated | Crude    | n/a                                                                             | Matched on month of diagnosis and hospital                                              | 0.806  | 0.377 |                                                       |
| Trecarichi EM, 2009 (59)         | 30-day                                  | 11  | 26   | 2    | 36    | 8.84 | 1.48-52.91 | Extracted  | Adjusted | Adjusted for inadequate initial antimicrobial therapy and prolonged neutropenia | n/a                                                                                     | 2.179  | 0.912 |                                                       |
| Tumbarello M, 2010 (84)          | 21-day                                  | 11  | 37   | 6    | 97    | 6.42 | 2.23-18.39 | Calculated | Crude    | n/a                                                                             | n/a                                                                                     | 1.859  | 0.538 |                                                       |
| Van Aken S, 2014 (92)            | 14-day                                  | 6   | 67   | 9    | 130   | 1.32 | 0.47-3.75  | Calculated | Crude    | n/a                                                                             | Matched on time period, bacterial species, occurrence of bacteremia, and study location | 0.278  | 0.530 |                                                       |
| Yip T, 2006 (81)                 | mortality (no definition)               | 3   | 11   | 3    | 77    | 9.25 | 1.81-48.00 | Calculated | Crude    | n/a                                                                             | n/a                                                                                     | 2.225  | 0.836 |                                                       |
| Yoon EJ, 2018 (61)               | 30-day                                  | 67  | 524  | 74   | 968   | 1.77 | 1.25-2.51  | Calculated | Crude    | n/a                                                                             | n/a                                                                                     | 0.571  | 0.178 |                                                       |
| <b>11b) Quinolone resistance</b> |                                         |     |      |      |       |      |            |            |          |                                                                                 |                                                                                         |        |       |                                                       |
| Abemethy JK, 2015 (50)           | 30-day all-cause                        | 797 | 3647 | 2853 | 16828 | 1.37 | 1.25-1.50  | Extracted  | Crude    | n/a                                                                             | n/a                                                                                     | 0.315  | 0.047 |                                                       |
| Bert F, 2008 (103)               | in-hospital all-cause                   | 5   | 11   | 33   | 60    | 0.68 | 0.20-2.36  | Calculated | Crude    | n/a                                                                             | n/a                                                                                     | -0.386 | 0.630 | The outcomes are presented for episodes not patients. |
| Camins BC, 2011 (78)             | in-hospital 30-day mortality            | 24  | 93   | 7    | 93    | 3.9  | 1.50-10.20 | Extracted  | Adjusted | Conditional and adjusted for cirrhosis, cardiac dysfunction, and gender         | matched on year of infection                                                            | 1.361  | 0.489 |                                                       |
| Cereto F, 2003 (102)             | in-hospital death during an SBP episode | 9   | 12   | 15   | 35    | 4    | 0.97-16.01 | Calculated | Crude    | n/a                                                                             | n/a                                                                                     | 1.386  | 0.715 |                                                       |
| Cereto F, 2008 (104)             | in-hospital death during an SBP episode | 9   | 18   | 9    | 29    | 2.22 | 0.66-7.34  | Calculated | Crude    | n/a                                                                             | n/a                                                                                     | 0.798  | 0.615 |                                                       |
| Cheong HJ, 2001 (101)            | in-hospital                             | 12  | 40   | 13   | 80    | 2.21 | 0.91-5.36  | Calculated | Crude    | n/a                                                                             | Matched on time                                                                         | 0.793  | 0.452 |                                                       |

|                          |             |       |      |       |      |      |             |            |          |                                                                                                                                                                |                                   |       |       |                                                                                                                             |
|--------------------------|-------------|-------|------|-------|------|------|-------------|------------|----------|----------------------------------------------------------------------------------------------------------------------------------------------------------------|-----------------------------------|-------|-------|-----------------------------------------------------------------------------------------------------------------------------|
| Cheong HS, 2007 (60)     | 30-day      | 22    | 132  | 47    | 376  | 1.4  | 0.81-2.42   | Calculated | Crude    | n/a                                                                                                                                                            | n/a                               | 0.336 | 0.279 |                                                                                                                             |
| Eom JS, 2002 (77)        | 30-day      | 7     | 60   | 2     | 80   | 5.15 | 1.03-25.76  | Calculated | Crude    | n/a                                                                                                                                                            | n/a                               | 1.639 | 0.821 |                                                                                                                             |
| Garau J, 1999 (100)      | in-hospital | 20    | 70   | 53    | 502  | 3.39 | 1.89-6.09   | Calculated | Crude    | n/a                                                                                                                                                            | n/a                               | 1.221 | 0.298 |                                                                                                                             |
| Huotari K, 2003 (54)     | 30-day      | 2.40% | 51   | 5.50% | 102  | nr   | nr          | n/a        | n/a      | n/a                                                                                                                                                            | Matched on same type of infection | n/a   | n/a   | Excluded from MA because the numbers for mortality don't multiply to a whole number. Mortality was reported in percentages. |
| Kim J, 2014 (79)         | 30-day      | 11    | 26   | 23    | 56   | 1.05 | 0.42-2.67   | Calculated | Crude    | n/a                                                                                                                                                            | n/a                               | 0.049 | 0.472 |                                                                                                                             |
| Laupland KB, 2008 (105)  | in-hospital |       |      |       |      | 1.8  | 1.20-2.80   | Extracted  | Adjusted | Adjusted for cancer, haematological malignancy, source/timing of infection, focus of infection, stroke, chronic lung disease, alcoholism, heart disease, & age | n/a                               | 0.588 | 0.216 |                                                                                                                             |
| Ortega M, 2009 (58)      | 30-day      | 161   | 1300 | 279   | 3458 | 1.61 | 1.31-1.98   | Calculated | Crude    | n/a                                                                                                                                                            | n/a                               | 0.476 | 0.105 |                                                                                                                             |
| Peralta G, 2007 (57)     | in-hospital | 10    | 125  | 26    | 538  | 1.71 | 0.82-3.60   | Calculated | Crude    | n/a                                                                                                                                                            | n/a                               | 0.536 | 0.377 |                                                                                                                             |
| Shin J, 2012 (106)       | in hospital | 0*    | 32*  | 0*    | 173* | 5.27 | 0.10-273.90 | Calculated | Crude    | n/a                                                                                                                                                            | n/a                               | 1.662 | 2.019 | *Continuity correction added 0.5 to all cells of 2X2 table                                                                  |
| Trecarichi EM, 2009 (59) | 30-day      | 12    | 39   | 1     | 23   | 9.78 | 1.18-81.15  | Calculated | Crude    | n/a                                                                                                                                                            | n/a                               | 2.280 | 1.079 |                                                                                                                             |
| Yoon EJ, 2018 (61)       | 30-day      | 69    | 590  | 72    | 902  | 1.53 | 1.08-2.16   | Calculated | Crude    | n/a                                                                                                                                                            | n/a                               | 0.425 | 0.177 |                                                                                                                             |
| <b>11c) MDR</b>          |             |       |      |       |      |      |             |            |          |                                                                                                                                                                |                                   |       |       |                                                                                                                             |
| Cheong HS, 2007 (60)     | 30-day      | 26    | 137  | 43    | 371  | 1.81 | 0.73-4.48   | Extracted  | Adjusted | Adjusted for CCI, UTI, Presentation with acute renal failure, Pitt bacteremia score, and Healthcare-associated                                                 | n/a                               | 0.593 | 0.463 |                                                                                                                             |

|                      |                       |     |      |     |      |             |                  |            |          |                                                                                                                                                                                                                                                                                                      |     |       |       |                                                                                                                                                                                                                                                                                                                    |
|----------------------|-----------------------|-----|------|-----|------|-------------|------------------|------------|----------|------------------------------------------------------------------------------------------------------------------------------------------------------------------------------------------------------------------------------------------------------------------------------------------------------|-----|-------|-------|--------------------------------------------------------------------------------------------------------------------------------------------------------------------------------------------------------------------------------------------------------------------------------------------------------------------|
| Lim C, 2016 (45)     | 30-day                | 645 | 1717 | 697 | 2562 | <b>1.61</b> | <b>1.41-1.83</b> | Calculated | Crude    | n/a                                                                                                                                                                                                                                                                                                  | n/a | 0.476 | 0.067 |                                                                                                                                                                                                                                                                                                                    |
| Parveen A, 2015 (39) | 30-day                | 44  | 98   | 36  | 129  | 1.85        | 0.89-3.86        | Extracted  | Adjusted | Adjusted for gender, hematological malignancy, hospitalization within 30 days prior to BSI, admission to ICU, previous chemo within 30 day, previous sx with 30 day, previous radiation within 30 day, neutropenia (<100 cells/mm3), co-morbidities, effectiveness of antimicrobial therapy, and age | n/a | 0.615 | 0.374 |                                                                                                                                                                                                                                                                                                                    |
| Uzodi AS, 2017 (62)  | death (no definition) | 0*  | 34*  | 1*  | 274* | 2.64        | 0.11-66.15       | Calculated | Crude    | n/a                                                                                                                                                                                                                                                                                                  | n/a | 0.971 | 1.632 | *Continuity correction added 0.5 to all cells of 2X2 table                                                                                                                                                                                                                                                         |
| Yoon EJ, 2018 (61)   | 30-day                | 97  | 865  | 44  | 627  | <b>1.67</b> | <b>1.16-2.42</b> | Extracted  | Adjusted | Adjusted for critically ill, polymicrobial infection, primary infection of urinary tract, primary infection of peritoneum, moderate to severe kidney disease, chronic liver disease, WBC, and sfa/foc for adhesion                                                                                   | n/a | 0.513 | 0.188 | Study used multivariable cox proportional hazard regression to report HR 1.59; 95% CI 1.1-2.29; adjusted for critically ill, polymicrobial infection, primary infection of urinary tract, primary infection of peritoneum, moderate to severe kidney disease, chronic liver disease, WBC, and sfa/foc for adhesion |
