# Supplementary material for: Evaluation of the health and healthcare system burden due to antimicrobial-resistant Escherichia coli infections in humans: a systematic review and meta-analysis
Source: PubMed Central journal article supplement (PMC7726913; doi:10.1186/s13756-020-00863-x), 2020-12-10
Supplement: 13756_2020_863_MOESM15_ESM.pdf [file 13756_2020_863_MOESM15_ESM.pdf]

**Additional file 15 - Results for bacterium-attributable mortality and third-generation cephalosporin resistance for a systematic review evaluating whether the measures of health or healthcare system burden increase in humans with antimicrobial-resistant *E. coli* infections.**

| Citation<br>(Reference # in<br>manuscript) | Deaths in<br>resistant<br>(R) group | Total<br>in R | Deaths in<br>susceptible<br>(S) group | Total<br>in S | Odds<br>Ratio<br>(OR) | 95%<br>Confidence<br>Ratio | OR<br>calculated<br>from raw<br>data or<br>extracted<br>from study | Crude or<br>adjusted<br>OR | Details of<br>multivariable<br>logistic<br>regression | Details of<br>matching                                                       | $\beta$ (Coefficient) | Standard<br>error | Comments                                                    |
|--------------------------------------------|-------------------------------------|---------------|---------------------------------------|---------------|-----------------------|----------------------------|--------------------------------------------------------------------|----------------------------|-------------------------------------------------------|------------------------------------------------------------------------------|-----------------------|-------------------|-------------------------------------------------------------|
| Cornejo-Juarez<br>P, 2012 (44)             | 34                                  | 71            | 19                                    | 56            | 1.79                  | 0.87-3.67                  | Calculated                                                         | Crude                      | n/a                                                   | Matched on date of<br>culture                                                | 0.582                 | 0.367             |                                                             |
| Feng XR, 2014<br>(47)                      | 0.5                                 | 33            | 1.5                                   | 59            | 0.59                  | 0.02-14.90                 | Calculated                                                         | Crude                      | n/a                                                   | n/a                                                                          | -0.528                | 1.687             | The outcomes are<br>presented for episodes<br>not patients. |
| Maslikowska<br>JA, 2016 (93)               | 3                                   | 61            | 1                                     | 49            | 2.48                  | 0.25-24.65                 | Calculated                                                         | Crude                      | n/a                                                   | Matched on sex,<br>age +/- 5 yr, type of<br>infection, and bed<br>allocation | 0.908                 | 1.171             |                                                             |
