# Supplementary material for: Evaluation of the health and healthcare system burden due to antimicrobial-resistant Escherichia coli infections in humans: a systematic review and meta-analysis
Source: PubMed Central journal article supplement (PMC7726913; doi:10.1186/s13756-020-00863-x), 2020-12-10
Supplement: 13756_2020_863_MOESM17_ESM.pdf [file 13756_2020_863_MOESM17_ESM.pdf]

**Additional file 17 - Results for treatment failure and the type of resistance of interest for a systematic review evaluating whether the measures of health or healthcare system burden increase in humans with antimicrobial-resistant *E. coli* infections.**

| Citation<br>(Reference # in manuscript)               | Term used to represent treatment failure                                           | Definition of treatment failure                                                                                                                                         | Lost to follow-up in each group                      | Result in antimicrobial resistant (R) group [number with treatment failure / total in group (%)] | Result in antimicrobial susceptible (S) group [number with treatment failure / total in group (%)] | Comparison of significance between groups (R vs S)                                                           | Comments |
|-------------------------------------------------------|------------------------------------------------------------------------------------|-------------------------------------------------------------------------------------------------------------------------------------------------------------------------|------------------------------------------------------|--------------------------------------------------------------------------------------------------|----------------------------------------------------------------------------------------------------|--------------------------------------------------------------------------------------------------------------|----------|
| <b>17a) Third-generation cephalosporin resistance</b> |                                                                                    |                                                                                                                                                                         |                                                      |                                                                                                  |                                                                                                    |                                                                                                              |          |
| Anunnatsiri S, 2012. (42)                             | Failure                                                                            | "Absence of improvement or worsening of sepsis" at 72 hours after the start of treatment (only assessed in patients that survived to 72 hours).                         | R - 3/32; S - 8/113 (all died within 72 hours)       | 7/29 (24.1%)                                                                                     | 6/105 (5.7%)                                                                                       | p=0.01                                                                                                       |          |
| Bollestad M, 2018. (107)                              | Treatment failure (persistent symptoms (a) and second antibiotic prescription (b)) | "Persistent symptoms leading to a second antibiotic prescription during the follow-up" period of up to two weeks after completion of initial antibiotic treatment       | R (a) - 1/88 (b) none; S (a) & (b) - 2/74            | (a) 32/87 (36.8%); (b) 30/88 (34.1%)                                                             | (a) 11/72 (15.3%); (b) 10/72 (13.9%)                                                               | (a) p=0.01; (b) p=0.01; univariable logistic regression model                                                |          |
| Can F, 2015. (41)                                     | Treatment failure                                                                  | Persistent symptoms 10 days after start of treatment or detection of resistance to initial/empiric antibiotic and switching to the appropriate antimicrobial.           | none                                                 | 17/70 (24.3%)                                                                                    | 18/224 (8.0%)                                                                                      | OR 2.2; 95% CI 1.14-4.4; p=0.02; univariable logistic regression                                             |          |
| Chakraborty A, 2012. (38)                             | Failure to improve with treatment                                                  | Included both relapses and death (there was no explicit definition of relapse or death).                                                                                | R - 5/132; S - 2/68                                  | 41/127 (32.3%)                                                                                   | 14/66 (21.2%)                                                                                      | nr                                                                                                           |          |
| Chauhan S, 2015 (40)                                  | (a) Clinical failure; (b) Microbiological failure                                  | (a) Persistence or worsening of any clinical parameter. (b) Persistent bacterial growth on culture after 3 days or more of antimicrobial therapy                        | R (a) - 18/85 (b) - 36/85; S (a) - 11/85 (b) - 54/85 | (a) 3/67 (4.5%); (b) 0/49 (0.0%)                                                                 | (a) 3/74 (4.1%); (b) 3/31 (9.7%)                                                                   | nr                                                                                                           |          |
| Esteve-Palau E, 2015. (75)                            | Clinical failure                                                                   | "No improvement or at least one of the initial symptoms worsened, needed a switch of antimicrobial therapy or died" within 7 days of diagnosis.                         | none                                                 | 24/60 (40.0%)                                                                                    | 4/60 (7.0%)                                                                                        | OR 8.01; 95% CI 2.48 - 25.92; p = 0.001; multivariable logistic regression adjusted for acute pyelonephritis |          |
| Fan NC, 2014. (108)                                   | Early treatment failure                                                            | "Fever persisted for more than three days despite treating with antibiotics and antibiotics would be changed within 3-5 days to improve the above clinical conditions." | none                                                 | 19/104 (18.3%)                                                                                   | 14/208 (6.7%)                                                                                      | p = 0.003; $\chi^2$ test                                                                                     |          |

|                            |                                                      |                                                                                                                                                                                                                                                                                           |                                                      |                                    |                                       |                                                                                                                                                                                                                                                                                                                                                                                                                                                                                                                                                                          |                                                   |
|----------------------------|------------------------------------------------------|-------------------------------------------------------------------------------------------------------------------------------------------------------------------------------------------------------------------------------------------------------------------------------------------|------------------------------------------------------|------------------------------------|---------------------------------------|--------------------------------------------------------------------------------------------------------------------------------------------------------------------------------------------------------------------------------------------------------------------------------------------------------------------------------------------------------------------------------------------------------------------------------------------------------------------------------------------------------------------------------------------------------------------------|---------------------------------------------------|
| Feng XR, 2014. (47)        | Treatment failure                                    | "Discontinuation of peritoneal dialysis, whether temporary or permanent, and death during peritonitis"                                                                                                                                                                                    | none                                                 | 2/32 (6.3%)                        | 7/58 (12.1%)                          | p = 0.31; $\chi^2$ test                                                                                                                                                                                                                                                                                                                                                                                                                                                                                                                                                  | Outcomes are presented for episodes not patients. |
| Kang CI, 2010. (51)        | Failure                                              | "No improvement or worsening of any of their clinical parameters as well as those who died" within 7 days of starting treatment.                                                                                                                                                          | R - 42/82; S - 267/783                               | 8/40 (20.0%)                       | 60/516 (11.6%)                        | p=0.13; $\chi^2$ test                                                                                                                                                                                                                                                                                                                                                                                                                                                                                                                                                    |                                                   |
| Lee S, 2014. (89)          | Microbiological failure                              | Bacterial growth on follow-up urine culture (taken within 5 days after antibiotic treatment started).                                                                                                                                                                                     | R - 4/26; S - 7/52                                   | 5/22 (23.0%)                       | 0/45 (0.0%)                           | p=0.01; McNemar's test                                                                                                                                                                                                                                                                                                                                                                                                                                                                                                                                                   |                                                   |
| Maslikowska JA, 2016. (93) | Clinical failure (a) and microbiological failure (b) | (a) "Absence of chart documented resolution of signs and symptoms of infection at the end of and 14 days following discontinuation of antibiotics."<br>(b) "Failure to achieve negative source culture(s) by the end of therapy and 14 days after discontinuation of antibiotics."        | R (a) - 28/61 (b) - 49/61; S (a) - 29/49 (b) - 46/49 | (a) 13/33 (39.0%); (b) 1/12 (8.3%) | (a) 3/20 (15.0%); (b) 0/3 (0.0%)      | (a) p = 0.0728; (b) p > 0.9999; Fisher's exact test                                                                                                                                                                                                                                                                                                                                                                                                                                                                                                                      |                                                   |
| Park SH, 2015. (94)        | Clinical failure (a) and microbiological failure (b) | (a) After initial improvement, either recurrence of symptoms or death during follow-up period of 4 weeks after completing antibiotic therapy.<br>(b) Persistence or recurrence of bacterial growth on culture during the follow-up period of 4 weeks after completing antibiotic therapy. | R (a) & (b) - none; S (a) - none (b) - 48/225        | (a) 4/75 (5.3%); (b) 9/75 (12.0%)  | (a) 20/225 (8.9%); (b) 26/177 (14.7%) | (a) HR 0.69; 95% CI 0.24-2.02; p = 0.50 (univariable)<br>HR 0.39; 95% CI 0.12-1.30; p = 0.13 (multivariable, adjusted for septic shock, immunocompromise, delay in appropriate treatment, age > 65 yr and antibiotic use within the previous year) (b) HR 0.89; 95% CI 0.41-1.89; p = 0.75 (univariable) HR 0.49; 95% CI 0.21-1.12; p = 0.091 (multivariable, adjusted for antibiotic use with the previous year, chronic kidney disease, diabetes, age > 65 year, concomitant BSI, urinary tract abnormality); multivariable Cox proportional hazards regression model. |                                                   |
| Soraas A, 2014. (109)      | Treatment failure                                    | Prescribing a second antibiotic (appropriate for UTI) within 1-14 days after diagnosis                                                                                                                                                                                                    | none                                                 | 43/81 (53%)                        | 58/262 (22.0%)                        | p < 0.001; $\chi^2$ test                                                                                                                                                                                                                                                                                                                                                                                                                                                                                                                                                 |                                                   |
| Tumbarello M, 2010. (84)   | Treatment failure                                    | Persistent or worsening signs of the infection or death within the first 72 hours                                                                                                                                                                                                         | none                                                 | 17/37 (45.9%)                      | 11/97 (11.3%)                         | OR = 3.2; 95% CI 1.96-5.27; p < 0.001                                                                                                                                                                                                                                                                                                                                                                                                                                                                                                                                    |                                                   |

|                                  |                                                      |                                                                                                                                                                                                                                                                                                                                          |                                                                                                   |                                                                              |                                                                                |                                                                                                                                                                                                                                                                                                       |  |
|----------------------------------|------------------------------------------------------|------------------------------------------------------------------------------------------------------------------------------------------------------------------------------------------------------------------------------------------------------------------------------------------------------------------------------------------|---------------------------------------------------------------------------------------------------|------------------------------------------------------------------------------|--------------------------------------------------------------------------------|-------------------------------------------------------------------------------------------------------------------------------------------------------------------------------------------------------------------------------------------------------------------------------------------------------|--|
| Yip T, 2006. (81)                | Treatment failure                                    | Discontinuation of peritoneal dialysis or death during peritonitis episode                                                                                                                                                                                                                                                               | none                                                                                              | 5/11 (45.5%)                                                                 | 10/77 (13.0%)                                                                  | p = 0.02; $\chi^2$ test                                                                                                                                                                                                                                                                               |  |
| <b>17b) Quinolone resistance</b> |                                                      |                                                                                                                                                                                                                                                                                                                                          |                                                                                                   |                                                                              |                                                                                |                                                                                                                                                                                                                                                                                                       |  |
| Camins BC, 2011. (78)            | Clinical failure                                     | If not discharged or died within 30 days of diagnosis, recurrent infection within 30 days or a positive blood culture for <i>E. coli</i> within 14 days after starting antimicrobial treatment.                                                                                                                                          | none                                                                                              | 26/93 (28.0%)                                                                | 8/93 (9.0%)                                                                    | p = 0.001; Mantel-Haenszel $\chi^2$ test                                                                                                                                                                                                                                                              |  |
| Can F, 2015. (41)                | Treatment failure                                    | Persistent symptoms 10 days after start of treatment or detection of resistance to initial/empiric antibiotic and switching to the appropriate choice.                                                                                                                                                                                   | none                                                                                              | 28/114 (24.6%)                                                               | 7/180 (3.9%)                                                                   | OR 3.1; 95% CI 1.62-6.02; p = 0.001; univariable logistic regression                                                                                                                                                                                                                                  |  |
| Cereto F, 2008. (104)            | Treatment failure                                    | Persistence of spontaneous bacterial peritonitis after 6 days of antibiotic therapy.                                                                                                                                                                                                                                                     | none                                                                                              | 4/18 (22.2%)                                                                 | 6/29 (20.7%)                                                                   | p = 1; $\chi^2$ test                                                                                                                                                                                                                                                                                  |  |
| Eom JS, 2002. (77)               | Fail-to-treat                                        | Bacterial growth on follow-up culture or UTI relapse within 2 weeks of the therapy ending                                                                                                                                                                                                                                                | R - 28/60; S - 27/80                                                                              | 11/34 (32.4%)                                                                | 6/53 (11.3%)                                                                   | p=0.02                                                                                                                                                                                                                                                                                                |  |
| Gagliotti C, 2008. (111)         | Treatment failure                                    | "Second isolation of <i>E. coli</i> from urine between 4 and 30 days after the first isolation."                                                                                                                                                                                                                                         | nr                                                                                                | nr                                                                           | nr                                                                             | IRR 1.85; 95% CI 1.32-2.60; p < 0.001; multivariable poisson regression adjusted for prescription of an antibiotic to which <i>E coli</i> is susceptible, prescription of fluoroquinolones, prescription of penicillins-beta-lactamase inhibitors, prescription of penicillins with extended spectrum |  |
| Jeon JH, 2012. (110)             | (a) Clinical failure;<br>(b) Microbiological failure | (a) Persistence or worsening of signs and symptoms, or recurrence after cure or improvement. (b) Identification of infection with a new pathogen or persistence of the original pathogen from culture during a follow-up visit (first (1st) - 4-7 days after starting treatment and second (2nd) - 14-21 days after finishing treatment) | 1st R (a) none (b) 3/39; S (a) none (b) 18/216; 2nd R (a) none (b) 15/39; S (a) 7/216 (b) 161/216 | 1st (a) 9/39 (23.1%) (b) 21/36 (58.3%); 2nd (a) 2/39 (5.1%) (b) 7/24 (29.2%) | 1st (a) 1/216 (0.5%) (b) 15/198 (7.6%); 2nd (a) 3/209 (1.4%) (b) 10/55 (18.2%) | 1st (a) p=0.135 (b) p<0.001; 2nd (a) p=0.177 (b) p=0.372; $\chi^2$ test                                                                                                                                                                                                                               |  |

|                      |                            |                                                                                                                                                              |                     |                |                |                                                                                                                                                 |  |
|----------------------|----------------------------|--------------------------------------------------------------------------------------------------------------------------------------------------------------|---------------------|----------------|----------------|-------------------------------------------------------------------------------------------------------------------------------------------------|--|
| Shin J, 2012. (106)  | Clinical treatment failure | Worsening of any clinical parameter after 3 days of treatment, failure to improve, or recurrence of symptoms within 4-10 days after completion of treatment. | none                | 7/32 (21.9%)   | 15/173 (8.7%)  | OR 2.94; 95% CI 1.03-8.37; p = 0.04; multivariable logistic regression adjusted for age, antibiotic use before visit and presence of bacteremia |  |
| <b>17c) MDR</b>      |                            |                                                                                                                                                              |                     |                |                |                                                                                                                                                 |  |
| Can F, 2015. (41)    | Treatment failure          | Persistent symptoms 10 days after start of treatment or detection of resistance to initial/empiric antibiotic and switching to the appropriate choice.       | none                | 30/116 (25.9%) | 5/178 (2.8%)   | OR 2.9; 95% CI 1.65-5.3; p < 0.001; univariable logistic regression                                                                             |  |
| Uzodi AS, 2017. (62) | Cure with recurrence       | Recurrence after cure (excluding death)                                                                                                                      | R - none S - 11/284 | 12/34 (35.0%)  | 55/273 (20.1%) | p > 0.05                                                                                                                                        |  |
