# Supplementary material for: Evaluation of the health and healthcare system burden due to antimicrobial-resistant Escherichia coli infections in humans: a systematic review and meta-analysis
Source: PubMed Central journal article supplement (PMC7726913; doi:10.1186/s13756-020-00863-x), 2020-12-10
Supplement: 13756_2020_863_MOESM18_ESM.pdf [file 13756_2020_863_MOESM18_ESM.pdf]

**Additional file 18 - Results for total length of hospital stay and the type of resistance of interest for a systematic review evaluating whether the measures of health or healthcare system burden increase in humans with antimicrobial-resistant *E. coli* infections.**

| Citation (Reference # in manuscript)                  | Mean LOS in resistant (R) group in days | SD of LOS in R group | Total in R | Mean LOS in susceptible (S) group in days | SD of LOS in S group | Total in S | Alternate LOS raw data                             | Details of matching                                                                      | Comments                                                                          |
|-------------------------------------------------------|-----------------------------------------|----------------------|------------|-------------------------------------------|----------------------|------------|----------------------------------------------------|------------------------------------------------------------------------------------------|-----------------------------------------------------------------------------------|
| <b>18a) Third-generation cephalosporin resistance</b> |                                         |                      |            |                                           |                      |            |                                                    |                                                                                          |                                                                                   |
| Apisarnthanarak A, 2008 (43)                          | nr                                      | nr                   | 46         | nr                                        | nr                   | 138        | median days (range) R - 8 (1-43); S - 6.5 (3-15)   | Matched on site of infection, hospital unit and day of admission (+/- 7 days).           |                                                                                   |
| Artero A, 2017 (95)                                   | 6.6                                     | 3.69                 | 85         | 5.61                                      | 3.16                 | 225        | n/a                                                | n/a                                                                                      |                                                                                   |
| Chauhan S, 2015 (40)                                  | 40.22                                   | 20.26                | 85         | 14                                        | 7.4                  | 85         | n/a                                                | Matched on time                                                                          |                                                                                   |
| Denis B, 2015 (74)                                    | nr                                      | nr                   | 41         | nr                                        | nr                   | 41         | median days (IQR) R - 15 (10-21); S - 11 (7-17)    | Matched on date of culture                                                               |                                                                                   |
| Esteve-Palau E, 2015 (75)                             | 11.6                                    | 1.5                  | 60         | 7.5                                       | 0.8                  | 60         | n/a                                                | Matched on sex, age, and date of admission.                                              |                                                                                   |
| Fan NC, 2014 (108)                                    | nr                                      | nr                   | 104        | nr                                        | nr                   | 208        | days R - 12.08; S - 6.88                           | Matched on age and sex                                                                   | Did not specify if LOS reported is a mean or median and no measure of variability |
| Huang YY, 2018 (97)                                   | nr                                      | nr                   | 58         | nr                                        | nr                   | 118        | median days (IQR) R - 11 (6-27); S - 7 (3-13)      | n/a                                                                                      |                                                                                   |
| Lee H, 2018 (99)                                      | nr                                      | nr                   | 50         | nr                                        | nr                   | 100        | median days (IQR) R - 13.5 (7-21); S - 7 (3-12)    | Matched on sex and age (+/- 5yr)                                                         |                                                                                   |
| Lee S, 2014 (89)                                      | 13.3                                    | 8.2                  | 26         | 7.3                                       | 3.5                  | 52         | n/a                                                | Matched on bacteremia, age, sex, CCI, SAPS II and modified APN score.                    |                                                                                   |
| Leistner R, 2014 (90)                                 | nr                                      | nr                   | 115        | nr                                        | nr                   | 983        | median days (IQR) R - 27 (12-53); S - 15 (8-32)    | n/a                                                                                      |                                                                                   |
| Nussbaum A, 2013 (88)                                 | 13.2                                    | nr                   | 34         | 13.7                                      | nr                   | 66         | median days (range) R - 12.5 (1-39); S - 11 (1-71) | Matched on age and gender                                                                |                                                                                   |
| Park SH, 2015 (94)                                    | nr                                      | nr                   | 75         | nr                                        | nr                   | 225        | median days (IQR) R - 11 (6-16); S - 7 (6-9)       | Matched on time (within a month of each case)                                            |                                                                                   |
| Van Aken S, 2014 (92)                                 | 11                                      | 12                   | 70         | 9                                         | 10                   | 140        | n/a                                                | Matched for time period, bacterial species, occurrence of bacteremia, and study location |                                                                                   |

| <b>18b) Quinolone resistance</b> |      |      |    |      |     |     |                                                  |  |                              |                                                                                   |
|----------------------------------|------|------|----|------|-----|-----|--------------------------------------------------|--|------------------------------|-----------------------------------------------------------------------------------|
| Camins BC, 2011<br>(78)          | 18.2 | 21.9 | 93 | 10.4 | 10  | 93  | n/a                                              |  | Matched on year of infection |                                                                                   |
| Huotari K, 2003<br>(54)          | nr   | nr   | 51 | nr   | nr  | 102 | days R - 17.7; S - 18.7                          |  | Matched on type of infection | Did not specify if LOS reported is a mean or median and no measure of variability |
| Jeon JH, 2012 (110)              | 8.2  | 5    | 39 | 7.8  | 3.1 | 216 | n/a                                              |  | n/a                          |                                                                                   |
| Shin J, 2012 (106)               | 9.6  | 5.5  | 32 | 7    | 3.5 | 173 | n/a                                              |  | n/a                          |                                                                                   |
| <b>18c) MDR</b>                  |      |      |    |      |     |     |                                                  |  |                              |                                                                                   |
| Uzodi AS, 2017<br>(62)           | nr   | nr   | 8  | nr   | nr  | 35  | median days (IQR) R - 10 (4.5-20.5); S - 4 (2-6) |  | n/a                          |                                                                                   |

LOS - length of hospital stay; SD - standard deviation; nr - not reported
