# Supplementary material for: Evaluation of the health and healthcare system burden due to antimicrobial-resistant Escherichia coli infections in humans: a systematic review and meta-analysis
Source: PubMed Central journal article supplement (PMC7726913; doi:10.1186/s13756-020-00863-x), 2020-12-10
Supplement: 13756_2020_863_MOESM20_ESM.pdf [file 13756_2020_863_MOESM20_ESM.pdf]

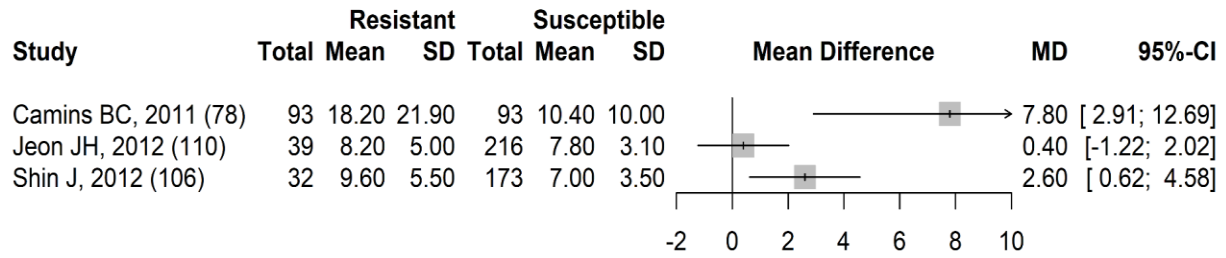

**Additional file 20:** Forest plot summarizing results from the random-effects meta-analysis assessing the impact of quinolone-resistant *E. coli* infection on total length of hospital stay (days).
