# Supplementary material for: Evaluation of the health and healthcare system burden due to antimicrobial-resistant Escherichia coli infections in humans: a systematic review and meta-analysis
Source: PubMed Central journal article supplement (PMC7726913; doi:10.1186/s13756-020-00863-x), 2020-12-10
Supplement: 13756_2020_863_MOESM21_ESM.pdf [file 13756_2020_863_MOESM21_ESM.pdf]

**Additional file 21 - Results for post-infection length of hospital stay and third-generation cephalosporin resistance for a systematic review evaluating whether the measures of health or healthcare system burden increase in humans with antimicrobial-resistant *E. coli* infections.**

| Citation (Reference # in manuscript) | Mean LOS in resistant (R) group in days | SD of LOS in R group | Total in R | Mean LOS in susceptible (S) group in days | SD of LOS in S group | Total in S | Alternate LOS raw data                          | Details of matching                                                                                                                                                           | Comments                                                                                   |
|--------------------------------------|-----------------------------------------|----------------------|------------|-------------------------------------------|----------------------|------------|-------------------------------------------------|-------------------------------------------------------------------------------------------------------------------------------------------------------------------------------|--------------------------------------------------------------------------------------------|
| Anunnatsiri S, 2012 (42)             | nr                                      | nr                   | 29         | nr                                        | nr                   | 105        | median days (range) R- 13 (3-48); S - 8 (3-102) | n/a                                                                                                                                                                           |                                                                                            |
| de Kraker ME, 2011 (49)              | nr                                      | nr                   | 109        | nr                                        | nr                   | 1101       | median days (IQR) R - 12 (6-25); S - 10 (6-17)  | n/a                                                                                                                                                                           |                                                                                            |
| Hsieh CJ, 2010 (68)                  | 21                                      | 27.1                 | 19         | 13.1                                      | 13                   | 385        | n/a                                             | n/a                                                                                                                                                                           |                                                                                            |
| Lambert ML, 2011 (53)                | nr                                      | nr                   | 21         | nr                                        | nr                   | 131        | median days (IQR) R - 16 (4-24); S - 9 (5-20)   | n/a                                                                                                                                                                           |                                                                                            |
| Leistner R, 2014 (112)               | nr                                      | nr                   | 92         | nr                                        | nr                   | 92         | median days (IQR) R - 15 (8-32); S - 17 (8-38)  | Matching of cases to controls 1:1, matched on age +/- 5 yr, sex, CCI +/- 2, discharge year and the LOS before BSI onset in the control had to be at least as long as the case |                                                                                            |
| Melzer M, 2007 (65)                  | nr                                      | nr                   | 18         | nr                                        | nr                   | 235        | median days R - 9; S - 12                       | n/a                                                                                                                                                                           | Does not include any of the patients that died and did not report a measure of variability |
| Tumbarello M, 2010 (84)              | 20                                      | 17                   | 37         | 13                                        | 9                    | 97         | n/a                                             | n/a                                                                                                                                                                           |                                                                                            |

LOS - length of hospital stay; SD - standard deviation; nr - not reported
