# Supplementary material for: Evaluation of the health and healthcare system burden due to antimicrobial-resistant Escherichia coli infections in humans: a systematic review and meta-analysis
Source: PubMed Central journal article supplement (PMC7726913; doi:10.1186/s13756-020-00863-x), 2020-12-10
Supplement: 13756_2020_863_MOESM23_ESM.pdf [file 13756_2020_863_MOESM23_ESM.pdf]

**Additional file 23 - Detailed results of GRADE assessment of primary outcomes for a systematic review evaluating whether the measures of health or healthcare system burden increase in humans with antimicrobial-resistant *E. coli* infections.<sup>a</sup>**

| Burden of disease measure | Type of antimicrobial resistance | Risk of bias                                                                                                  | Inconsistency                                                                                                          | Publication bias                                          | Imprecision                                                                                                       | Other considerations <sup>b</sup>                                    | Certainty of evidence (GRADE) | Comments                                                                                       |
|---------------------------|----------------------------------|---------------------------------------------------------------------------------------------------------------|------------------------------------------------------------------------------------------------------------------------|-----------------------------------------------------------|-------------------------------------------------------------------------------------------------------------------|----------------------------------------------------------------------|-------------------------------|------------------------------------------------------------------------------------------------|
| 30-day mortality          | 3GC-R                            | No strong evidence to downgrade, with ROBINS-I: Serious (11 studies); Moderate (12 studies)                   | No serious inconsistency, study point estimates generally same only 1 is 0.95 others all >1, 95% CIs overlap, I2 = 49% | No strong evidence to downgrade, minimal publication bias | No serious imprecision, very large sample size and 95% CI of sOR does not include null                            | Strong association sOR 2.02 (1.66-2.46) evidence to support upgrade  | ⊕⊕⊕○<br>MODERATE              | Evidence to support upgrading due to strong association and no evidence to support downgrading |
| 30-day mortality          | Quinolone                        | No strong evidence to downgrade, with ROBINS-I: Serious (5 studies); Moderate (3 studies)                     | No serious inconsistency, study point estimates generally same all >1, 95% CIs overlap, I2 = 44%                       | Unable to assess                                          | No serious imprecision, very large sample size (even with only 8 studies) and 95% CI of sOR does not include null |                                                                      | ⊕⊕○○<br>LOW                   | No evidence to support downgrading or upgrading                                                |
| 30-day mortality          | MDR                              | No strong evidence to downgrade, with ROBINS-I: Serious (2 studies); Moderate (2 studies)                     | No serious inconsistency, study point estimates very similar, 95% CIs overlap, I2 = 0%                                 | Unable to assess                                          | No serious imprecision, large sample size (even with only 4 studies) and 95% CI of sOR does not include null      |                                                                      | ⊕⊕○○<br>LOW                   | No evidence to support downgrading or upgrading                                                |
| All-cause mortality       | 3GC-R                            | No strong evidence to downgrade, with ROBINS-I: Critical (1 study); Serious (21 study); Moderate (29 studies) | No serious inconsistency, study point estimates generally same only 4 are ≤ 1 others all >1, 95% CIs overlap, I2 = 56% | No strong evidence to downgrade, minimal publication bias | No serious imprecision, very large sample size and 95% CI of sOR does not include null                            | Strong association sOR 2.26 (1.90-2.68), evidence to support upgrade | ⊕⊕⊕○<br>MODERATE              | Evidence to support upgrading due to strong association and no evidence to support downgrading |
| All-cause mortality       | Quinolone                        | No strong evidence to downgrade, with ROBINS-I: Serious (8 studies); Moderate (8 studies)                     | No serious inconsistency, study point estimates generally same only 1 is 0.68 others all >1, 95% CIs overlap, I2 = 44% | Minimal publication bias, no strong evidence to downgrade | No serious imprecision, very large sample size and 95% CI of sOR does not include null                            |                                                                      | ⊕⊕○○<br>LOW                   | No evidence to support downgrading or upgrading                                                |

|                                  |           |                                                                                             |                                                                                                                         |                  |                                                                                                              |                                                                                 |                  |                                                                                                                     |
|----------------------------------|-----------|---------------------------------------------------------------------------------------------|-------------------------------------------------------------------------------------------------------------------------|------------------|--------------------------------------------------------------------------------------------------------------|---------------------------------------------------------------------------------|------------------|---------------------------------------------------------------------------------------------------------------------|
| All-cause mortality              | MDR       | No strong evidence to downgrade, with ROBINS-I: Serious (3 studies)<br>Moderate (2 studies) | No serious inconsistency, study point estimates generally very similar, 95% CIs overlap, I <sup>2</sup> = 0%            | Unable to assess | No serious imprecision, large sample size (even with only 5 studies) and 95% CI of sOR does not include null |                                                                                 | ⊕⊕○○<br>LOW      | No evidence to support downgrading or upgrading                                                                     |
| Bacterium-attributable mortality | 3GC-R     | No strong evidence to downgrade, with ROBINS-I: Serious (2 studies);<br>Moderate (1 study)  | Serious inconsistency, study point estimates different                                                                  | Unable to assess | Serious imprecision, small sample size and 95% CI of sOR include null and is very wide                       |                                                                                 | ⊕○○○<br>VERY LOW | Downgraded due to serious inconsistency and imprecision. No evidence to support upgrading.                          |
| LOS                              | 3GC-R     | No strong evidence to downgrade, with ROBINS-I: Moderate (5 studies)                        | Serious inconsistency, one study's point estimates very different and the 95% CI does not overlap, I <sup>2</sup> = 97% | Unable to assess | Serious imprecision, small sample size                                                                       | Unable to assess strength of sMD                                                | ⊕○○○<br>VERY LOW | Downgraded due to serious inconsistency and imprecision.                                                            |
| LOS                              | Quinolone | No strong evidence to downgrade, with ROBINS-I: Serious (1 study);<br>Moderate (2 studies)  | Serious inconsistency, study point estimates different, I <sup>2</sup> = 78.3%                                          | Unable to assess | Serious imprecision, small sample size                                                                       | Unable to assess strength of sMD                                                | ⊕○○○<br>VERY LOW | Downgraded due to serious inconsistency and imprecision.                                                            |
| Post-infection LOS               | 3GC-R     | No strong evidence to downgrade, with ROBINS-I: Moderate (2 studies)                        | No serious inconsistency, study point estimates are similar, 95% CIs overlap, I <sup>2</sup> = 0%                       | Unable to assess | Serious imprecision, due to small sample size                                                                | Strong association sMD 7.16 days (2.76-11.57 days), evidence to support upgrade | ⊕○○○<br>VERY LOW | Downgraded due to serious imprecision. Evidence to support upgrading outweighed by evidence to support downgrading. |

3GC-R - third-generation cephalosporin resistance; CI - confidence interval; sOR - summary odds ratio; MDR - multidrug resistance; LOS - length of hospital stay; sMD - summary mean difference

<sup>a</sup> For all of the outcomes and type of AMR there was no serious indirectness, populations were comparable, exposures were the same and outcomes were direct

<sup>b</sup> Strong association sOR ≥ 2 or MD ≥ 5 days
