# Supplementary material for: Evaluation of the health and healthcare system burden due to antimicrobial-resistant Escherichia coli infections in humans: a systematic review and meta-analysis
Source: Antimicrob Resist Infect Control. 2020 Dec 10;9:200. doi: 10.1186/s13756-020-00863-x (PMC7726913; doi:10.1186/s13756-020-00863-x)
Supplement: Supplementary file 2 — Additional file 2: Ovid MEDLINE® search strategy for systematic review evaluating burden of disease in antimicrobial-resistant E. coli infections [file 13756_2020_863_MOESM2_ESM.pdf]

**Additional file 2:** Ovid MEDLINE® search strategy for systematic review evaluating burden of disease in antimicrobial-resistant *E. coli* infections.

| # | Searches                                                                                                                                                                                                                                                                                                                                                                                                                                                                                                                                                                                                                                                                                                                                                                                                                                                           | Results     | Annotations                                       |
|---|--------------------------------------------------------------------------------------------------------------------------------------------------------------------------------------------------------------------------------------------------------------------------------------------------------------------------------------------------------------------------------------------------------------------------------------------------------------------------------------------------------------------------------------------------------------------------------------------------------------------------------------------------------------------------------------------------------------------------------------------------------------------------------------------------------------------------------------------------------------------|-------------|---------------------------------------------------|
| 1 | Escherichia coli.sh,xs. or Escherichia coli.ab,kf,ti. or e coli.ab,kf,ti.                                                                                                                                                                                                                                                                                                                                                                                                                                                                                                                                                                                                                                                                                                                                                                                          | 366819      | Population - <i>E. coli</i> terms                 |
| 2 | Cephalosporins.sh,xs. or cephalosporin\$.ab,kf,ti. or beta Lactamases.sh,xs. or b lactamase\$.ab,kf,ti. or beta lactamase\$.ab,kf,ti. or ESBL.ab,kf,ti.<br>or cefcapene.ab,kf,ti. or ceftidinar.ab,kf,ti. or ceftidoren.ab,kf,ti. or cefepime.ab,kf,ti. or cetetamet.ab,kf,ti. or cefixime.ab,kf,ti. or cefmenoxime.ab,kf,ti. or cefodizime.ab,kf,ti. or cefoperazone.ab,kf,ti. or cefoselis.ab,kf,ti. or cefotaxime.ab,kf,ti. or ceftozopran.ab,kf,ti. or cefpiramide.ab,kf,ti. or cefpirome.ab,kf,ti. or cefpodoxime.ab,kf,ti. or cefsulodin.ab,kf,ti. or ceftaroline.ab,kf,ti. or ceftazidime.ab,kf,ti. or ceftizoxime.ab,kf,ti. or ceftobiprole.ab,kf,ti. or ceftibuten.ab,kf,ti. or ceftolozane.ab,kf,ti. or ceftriaxone.ab,kf,ti. or latamoxef.ab,kf,ti. or tazobactam.ab,kf,ti.                                                                             | 71682       | Exposure - Cephalosporin and beta-lactamase terms |
| 3 | Quinolones.sh,xs. or fluoroquinolone\$.ab,kf,ti. or quinolone\$.ab,kf,ti. or cinoxacin\$.ab,kf,ti. or ciprofloxacin\$.ab,kf,ti. or enoxacin\$.ab,kf,ti. or fleroxacin\$.ab,kf,ti. or flumequine.ab,kf,ti. or garenoxacin\$.ab,kf,ti. or gatifloxacin\$.ab,kf,ti. or gemifloxacin\$.ab,kf,ti. or grepafloxacin\$.ab,kf,ti. or levofloxacin\$.ab,kf,ti. or lomefloxacin\$.ab,kf,ti. or moxifloxacin\$.ab,kf,ti. or nalidixic acid.ab,kf,ti. or norfloxacin\$.ab,kf,ti. or ofloxacin\$.ab,kf,ti. or oxolinic acid.ab,kf,ti. or pazufloxacin\$.ab,kf,ti. or pefloxacin\$.ab,kf,ti. or pipemidic acid.ab,kf,ti. or piromidic acid.ab,kf,ti. or prulifloxacin\$.ab,kf,ti. or rosoxacin\$.ab,kf,ti. or rifloxacin\$.ab,kf,ti. or sitafloxacin\$.ab,kf,ti. or sparfloracin\$.ab,kf,ti. or temafloxacin\$.ab,kf,ti. or delafloxacin\$.ab,kf,ti. or nadifloxacin\$.ab,kf,ti. | 62793       | Exposure - Quinolone terms                        |
| 4 | Drug Resistance, Multiple, Bacterial.sh,xs. or (multidrug resistanc\$ or MDR or multiple drug resistanc\$ or multiple drug resistanc\$ or extreme\$ drug resistanc\$ or extensive\$ drug resistanc\$ or XDR or pandrug resistanc\$ or PDR or highly resistanc\$ or important antimicrobial\$ or important antibiotic\$).ab,kf,ti.                                                                                                                                                                                                                                                                                                                                                                                                                                                                                                                                  | 75834       | Exposure - MDR terms                              |
| 5 | (economics, hospital or "Costs and Cost Analysis" or economics, medical).sh,xs. or economics, pharmaceutical.sh. or "fees and charges".sh,xs. or budgets.sh,xs. or (health\$care adj cost\$).ab,kf,ti. or (cost\$ adj variable).ab,kf,ti. or (low adj cost\$).ab,kf,ti. or (high adj cost\$).ab,kf,ti. or (cost\$ adj estimate\$).ab,kf,ti. or (unit adj cost\$).ab,kf,ti. or (economic\$ or pharmaco-economic\$ or price\$).ab,kf,ti.                                                                                                                                                                                                                                                                                                                                                                                                                             | 411134      | Outcome - Cost terms                              |
| 6 | hospitalization.sh,xs. or Health Resources.sh. or Utilization Review.sh,xs. or Mortality.sh,xs. or morbidity.sh. or treatment failure.sh,xs. or intensive care units.sh,xs. or "length of stay".ab,kf,ti. or hospital stay.ab,kf,ti. or "resource use".ab,kf,ti. or resource util\$.ab,kf,ti. or burden.ab,kf,ti.<br>or mortality.ab,kf,ti. or morbidity.ab,kf,ti. or clinical impact\$.ab,kf,ti. or outcome\$.ab,kf,ti. or prognos*.ab,kf,ti. or hospitali\$.ab,kf,ti. or fatalit\$.ab,kf,ti. or death\$.ab,kf,ti. or (ICU or intensive care or critical care).ab,kf,ti. or treatment failure.ab,kf,ti. or failed treatment.ab,kf,ti. or clinical failure.ab,kf,ti. or adverse consequence\$.ab,kf,ti. or drug failure\$.ab,kf,ti. or epidemiolog\$.ab,kf,ti. or factor\$.ab,kf,ti. or retreat\$.ab,kf,ti.                                                        | 5641890     | Outcome – Non-cost terms                          |
| 7 | 1 and (2 or 3 or 4) and (5 or 6)                                                                                                                                                                                                                                                                                                                                                                                                                                                                                                                                                                                                                                                                                                                                                                                                                                   | 6318        |                                                   |
| 8 | limit 7 to yr="1999-Current"                                                                                                                                                                                                                                                                                                                                                                                                                                                                                                                                                                                                                                                                                                                                                                                                                                       | <b>5416</b> |                                                   |
